# Supplementary material for: Edwardsiella tarda-Induced Inhibition of Apoptosis: A Strategy for Intracellular Survival
Source: Front Cell Infect Microbiol. 2016 Jul 14;6:76. doi: 10.3389/fcimb.2016.00076 (PMC4943942; doi:10.3389/fcimb.2016.00076)
Supplement: Additional file 1 — Annotation results of 958 differentially expressed genes. [file DataSheet1.XLSX]

## Sheet: Sheet1
576 up-regulated genes
Accession	log2fold_change	p-value	significant	annotation
ENSDART00000134028	11.616	4.7775e-06	yes	si:dkey-20i20.9 [Source:ZFIN;Acc:ZDB-GENE-060503-152]
ENSDART00000039657	8.2334	0.0027481	yes	alpha-tropomyosin [Source:ZFIN;Acc:ZDB-GENE-990415-269]
ENSDART00000139140	8.04931	6.0064e-07	yes	periostin, osteoblast specific factor b [Source:ZFIN;Acc:ZDB-GENE-030131-9120]
ENSDART00000141564	8.03645	1.3548e-05	yes	polypyrimidine tract binding protein 1a [Source:ZFIN;Acc:ZDB-GENE-050522-492]
ENSDART00000111749	7.78799	0.0082667	yes	spinster homolog 2 (Drosophila) [Source:ZFIN;Acc:ZDB-GENE-030131-5843]
ENSDART00000149980	7.70372	0.0047528	yes	Williams Beuren syndrome chromosome region 22 [Source:ZFIN;Acc:ZDB-GENE-070410-68]
ENSDART00000143156	7.59668	0.0082667	yes	Uncharacterized protein [Source:UniProtKB/TrEMBL;Acc:E9QBC7]
ENSDART00000041912	7.42322	0.0082668	yes	transglutaminase 1 [Source:HGNC Symbol;Acc:HGNC:11777]
ENSDART00000087474	6.89873	0.00054449	yes	EF-hand calcium binding domain 1 [Source:ZFIN;Acc:ZDB-GENE-040914-40]
ENSDART00000114649	6.54768	0.0082667	yes	zgc:174694 [Source:ZFIN;Acc:ZDB-GENE-080218-12]
ENSDART00000149425	6.52597	0.00011063	yes	solute carrier family 25 (mitochondrial carrier: glutamate), member 22 [Source:HGNC Symbol;Acc:HGNC:19954]
ENSDART00000125810	6.5188	0.0015963	yes	vacuolar protein sorting 13 homolog B (yeast) [Source:HGNC Symbol;Acc:HGNC:2183]
ENSDART00000061926	6.4718	0.0015963	yes	syntaxin 11b, tandem duplicate 2 [Source:ZFIN;Acc:ZDB-GENE-050417-148]
ENSDART00000063159	6.42979	0.0047528	yes	Uncharacterized protein [Source:UniProtKB/TrEMBL;Acc:E7FEI7]
ENSDART00000082450	6.38314	0.00054449	yes	homer homolog 2 (Drosophila) [Source:HGNC Symbol;Acc:HGNC:17513]
ENSDART00000128023	6.29229	0.00031938	yes	BTB (POZ) domain containing 2 [Source:ZFIN;Acc:ZDB-GENE-030829-3]
ENSDART00000016267	6.22334	0.0082667	yes	structural maintenance of chromosomes flexible hinge domain containing 1 [Source:ZFIN;Acc:ZDB-GENE-050211-6]
ENSDART00000139229	6.15755	0.0027481	yes	P450 (cytochrome) oxidoreductase [Source:ZFIN;Acc:ZDB-GENE-050809-121]
ENSDART00000113460	6.12821	0.0082667	yes	FtsJ RNA methyltransferase homolog 2 (E. coli) [Source:HGNC Symbol;Acc:HGNC:16352]
ENSDART00000155442	5.95221	0.0082668	yes	zgc:154006 [Source:ZFIN;Acc:ZDB-GENE-061013-134]
ENSDART00000151926	5.8676	1.6912e-06	yes	protein tyrosine phosphatase type IVA, member 1 [Source:ZFIN;Acc:ZDB-GENE-041121-11]
ENSDART00000154662	5.68186	0.0047529	yes	CDK5 regulatory subunit associated protein 1 [Source:HGNC Symbol;Acc:HGNC:15880]
ENSDART00000134114	5.55532	0.0082668	yes	early B-cell factor 1a [Source:ZFIN;Acc:ZDB-GENE-081028-51]
ENSDART00000142433	5.48393	6.53e-05	yes	makorin, ring finger protein, 1 [Source:ZFIN;Acc:ZDB-GENE-020213-1]
ENSDART00000141416	5.24671	0.0015964	yes	si:dkey-20i20.13 [Source:ZFIN;Acc:ZDB-GENE-060503-245]
ENSDART00000129420	5.23232	0.00054449	yes	Uncharacterized protein [Source:UniProtKB/TrEMBL;Acc:E7FDG2]
ENSDART00000146183	5.18537	0.0027482	yes	Rap guanine nucleotide exchange factor (GEF) 2 [Source:HGNC Symbol;Acc:HGNC:16854]
ENSDART00000149466	5.11487	0.00093082	yes	si:ch73-103b2.3 [Source:ZFIN;Acc:ZDB-GENE-110408-10]
ENSDART00000124827	5.07842	0.0082668	yes	leucine-rich repeat LGI family, member 2a [Source:ZFIN;Acc:ZDB-GENE-060217-2]
ENSDART00000141696	5.06687	0.00054449	yes	PRP3 pre-mRNA processing factor 3 homolog (yeast) [Source:ZFIN;Acc:ZDB-GENE-040823-3]
ENSDART00000054441	5.06347	0.0082668	yes	ERI1 exoribonuclease family member 2 [Source:ZFIN;Acc:ZDB-GENE-050522-292]
ENSDART00000144677	4.83826	0.0027482	yes	muscle RAS oncogene homolog [Source:HGNC Symbol;Acc:HGNC:7227]
ENSDART00000111988	4.72428	0.00080927	yes	HEAT repeat containing 2 [Source:HGNC Symbol;Acc:HGNC:26013]
ENSDART00000092942	4.65686	0.0015964	yes	solute carrier family 25 (mitochondrial carrier; ornithine transporter) member 15a [Source:ZFIN;Acc:ZDB-GENE-070112-1072]
ENSDART00000136387	4.64279	0.0047529	yes	si:rp71-1g18.1 [Source:ZFIN;Acc:ZDB-GENE-030131-5470]
ENSDART00000135354	4.54617	0.0047529	yes	zgc:174642 [Source:ZFIN;Acc:ZDB-GENE-071004-71]
ENSDART00000064472	4.50088	0.0015964	yes	proline-rich nuclear receptor coactivator 1 [Source:ZFIN;Acc:ZDB-GENE-040724-189]
ENSDART00000106388	4.48854	0.0023318	yes	eukaryotic translation elongation factor 1 epsilon 1 [Source:ZFIN;Acc:ZDB-GENE-030131-4949]
ENSDART00000006922	4.43634	0.0027482	yes	chymotrypsin-like [Source:HGNC Symbol;Acc:HGNC:2524]
ENSDART00000128137	4.43548	0.000478	yes	zgc:92594 [Source:ZFIN;Acc:ZDB-GENE-040718-482]
ENSDART00000133007	4.42979	0.0082668	yes	glutamic pyruvate transaminase (alanine aminotransferase) 2, like [Source:ZFIN;Acc:ZDB-GENE-050302-11]
ENSDART00000140108	4.41895	0.0015964	yes	cytokine inducible SH2-containing protein [Source:ZFIN;Acc:ZDB-GENE-050907-1]
ENSDART00000124980	4.34009	0.0027482	yes	Uncharacterized protein [Source:UniProtKB/TrEMBL;Acc:F1QLD0]
ENSDART00000130639	4.30665	0.0015964	yes	Uncharacterized protein [Source:UniProtKB/TrEMBL;Acc:E7F8H7]
ENSDART00000148509	4.29229	0.0082668	yes	FYVE and coiled-coil domain containing 1a [Source:ZFIN;Acc:ZDB-GENE-110411-276]
ENSDART00000153502	4.28187	1.2415e-05	yes	transmembrane protein 199 [Source:ZFIN;Acc:ZDB-GENE-050522-150]
ENSDART00000102483	4.26953	0.0082668	yes	regulator of G-protein signalling 4 [Source:ZFIN;Acc:ZDB-GENE-030131-9839]
ENSDART00000066896	4.24462	0.0047529	yes	synaptotagmin Ia [Source:ZFIN;Acc:ZDB-GENE-040718-165]
ENSDART00000156283	4.24239	0.0027482	yes	TAF15 RNA polymerase II, TATA box binding protein (TBP)-associated factor [Source:ZFIN;Acc:ZDB-GENE-061215-102]
ENSDART00000145851	4.20388	0.0039704	yes	outer dense fiber of sperm tails 2b [Source:ZFIN;Acc:ZDB-GENE-041008-119]
ENSDART00000026816	4.18557	2.2282e-08	yes	COX20 cytochrome C oxidase assembly factor [Source:HGNC Symbol;Acc:HGNC:26970]
ENSDART00000003444	4.16975	0.0047529	yes	SH2 domain containing 3Cb [Source:ZFIN;Acc:ZDB-GENE-040426-1052]
ENSDART00000139550	4.16206	0.0027482	yes	Kruppel-like factor 3 (basic) [Source:ZFIN;Acc:ZDB-GENE-011116-1]
ENSDART00000078499	4.1524	0.0082668	yes	raftlin family member 2 [Source:ZFIN;Acc:ZDB-GENE-040426-2760]
ENSDART00000083690	4.15169	0.0027482	yes	biliverdin reductase A [Source:ZFIN;Acc:ZDB-GENE-060929-312]
ENSDART00000150358	4.12259	0.0082668	yes	actin binding LIM protein family, member 3 [Source:ZFIN;Acc:ZDB-GENE-070112-1122]
ENSDART00000123628	4.10189	0.0039704	yes	Uncharacterized protein [Source:UniProtKB/TrEMBL;Acc:E7EZP1]
ENSDART00000132312	4.09346	0.0047529	yes	tenascin C [Source:ZFIN;Acc:ZDB-GENE-980526-104]
ENSDART00000145209	4.0853	0.0013724	yes	activin A receptor, type IIAa [Source:ZFIN;Acc:ZDB-GENE-980526-227]
ENSDART00000150487	4.05782	0.0047529	yes	si:dkey-72l17.5 [Source:ZFIN;Acc:ZDB-GENE-070424-250]
ENSDART00000131938	4.05216	0.0039704	yes	PET112 homolog (yeast) [Source:ZFIN;Acc:ZDB-GENE-040724-131]
ENSDART00000137055	4.04881	0.0082668	yes	cysteinyl-tRNA synthetase 2, mitochondrial [Source:ZFIN;Acc:ZDB-GENE-030131-5564]
ENSDART00000124289	4.02099	0.0082668	yes	si:ch73-29c22.1 [Source:ZFIN;Acc:ZDB-GENE-091204-309]
ENSDART00000141344	4.0018	0.0082668	yes	si:dkey-15h8.12 [Source:ZFIN;Acc:ZDB-GENE-050208-386]
ENSDART00000153645	3.99806	0.0067768	yes	PWWP domain containing 2A [Source:HGNC Symbol;Acc:HGNC:29406]
ENSDART00000149232	3.99531	0.0023318	yes	bridging integrator 1 [Source:ZFIN;Acc:ZDB-GENE-030425-1]
ENSDART00000005496	3.94087	0.00028276	yes	potassium channel tetramerisation domain containing 9 [Source:ZFIN;Acc:ZDB-GENE-040718-238]
ENSDART00000147410	3.91076	5.8977e-05	yes	protein kinase C and casein kinase substrate in neurons 3 [Source:ZFIN;Acc:ZDB-GENE-040426-984]
ENSDART00000109477	3.89981	0.0013724	yes	suppressor of cytokine signaling 9 [Source:ZFIN;Acc:ZDB-GENE-030131-4065]
ENSDART00000105936	3.88552	0.0013724	yes	si:dkey-253d23.8 [Source:ZFIN;Acc:ZDB-GENE-050208-568]
ENSDART00000015732	3.86816	5.8977e-05	yes	myosin, light polypeptide 3, skeletal muscle [Source:ZFIN;Acc:ZDB-GENE-000322-6]
ENSDART00000134069	3.84483	3.5052e-05	yes	si:dkeyp-20g2.3 [Source:ZFIN;Acc:ZDB-GENE-070705-537]
ENSDART00000137899	3.81071	0.0082668	yes	transmembrane protein 9 [Source:ZFIN;Acc:ZDB-GENE-030131-6083]
ENSDART00000139624	3.77182	5.8977e-05	yes	AHA1, activator of heat shock protein ATPase homolog 1, like [Source:ZFIN;Acc:ZDB-GENE-030131-664]
ENSDART00000154600	3.73958	8.1163e-08	yes	origin recognition complex, subunit 3 [Source:ZFIN;Acc:ZDB-GENE-030131-6247]
ENSDART00000081902	3.69906	7.7133e-05	yes	chromosome 19 open reading frame 10 [Source:HGNC Symbol;Acc:HGNC:16948]
ENSDART00000009473	3.68569	0.0039704	yes	zinc finger, AN1-type domain 1 [Source:ZFIN;Acc:ZDB-GENE-040801-269]
ENSDART00000023550	3.63208	1.3995e-22	yes	heat shock protein 90, alpha (cytosolic), class A member 1, tandem duplicate 2 [Source:ZFIN;Acc:ZDB-GENE-031001-3]
ENSDART00000052838	3.62414	3.6777e-12	yes	actin, alpha 1a, skeletal muscle [Source:ZFIN;Acc:ZDB-GENE-050417-267]
ENSDART00000156944	3.57989	0.0067768	yes	myosin XVIIIAb [Source:ZFIN;Acc:ZDB-GENE-080423-1]
ENSDART00000103236	3.57075	0.00080928	yes	ankyrin repeat domain 37 [Source:ZFIN;Acc:ZDB-GENE-070308-1]
ENSDART00000132785	3.56675	0.00028276	yes	lysine-rich nucleolar protein 1 [Source:ZFIN;Acc:ZDB-GENE-090313-76]
ENSDART00000142054	3.56234	0.0013724	yes	nucleoporin 153 [Source:ZFIN;Acc:ZDB-GENE-030131-4581]
ENSDART00000147693	3.542	0.00016749	yes	structural maintenance of chromosomes 5 [Source:ZFIN;Acc:ZDB-GENE-061013-288]
ENSDART00000151101	3.5375	0.00080929	yes	TruB pseudouridine (psi) synthase homolog 2 (E. coli) [Source:ZFIN;Acc:ZDB-GENE-040704-41]
ENSDART00000146989	3.53017	0.0023318	yes	fizzy/cell division cycle 20 related 1 (Drosophila) [Source:ZFIN;Acc:ZDB-GENE-040426-712]
ENSDART00000145278	3.50526	0.0013724	yes	si:dkey-29b11.3 [Source:ZFIN;Acc:ZDB-GENE-100922-178]
ENSDART00000135895	3.47851	0.0013724	yes	peroxisomal biogenesis factor 7 [Source:ZFIN;Acc:ZDB-GENE-050320-105]
ENSDART00000156774	3.46356	1.667e-05	yes	DPH6 homolog (S. cerevisiae) [Source:ZFIN;Acc:ZDB-GENE-050227-15]
ENSDART00000125761	3.45579	0.000478	yes	NHL repeat containing 3 [Source:HGNC Symbol;Acc:HGNC:33751]
ENSDART00000131794	3.44343	0.0013724	yes	signal recognition particle 54 [Source:ZFIN;Acc:ZDB-GENE-040426-818]
ENSDART00000108667	3.4357	0.0067768	yes	dual specificity phosphatase 4 [Source:HGNC Symbol;Acc:HGNC:3070]
ENSDART00000146968	3.43084	7.7132e-05	yes	canopy1 [Source:ZFIN;Acc:ZDB-GENE-060315-3]
ENSDART00000112474	3.39797	0.0005961	yes	ADP-ribosylation factor-like 6 interacting protein 5a [Source:ZFIN;Acc:ZDB-GENE-031113-22]
ENSDART00000140042	3.39737	0.0005961	yes	adaptor-related protein complex 1, beta 1 subunit [Source:ZFIN;Acc:ZDB-GENE-061025-1]
ENSDART00000010824	3.39277	0.0013724	yes	Uncharacterized protein [Source:UniProtKB/TrEMBL;Acc:E7EXK9]
ENSDART00000023842	3.38589	0.0023319	yes	protein phosphatase 1D magnesium-dependent, delta isoform a [Source:ZFIN;Acc:ZDB-GENE-040426-815]
ENSDART00000147508	3.34887	0.0013724	yes	v-ral simian leukemia viral oncogene homolog Aa (ras related) [Source:ZFIN;Acc:ZDB-GENE-040426-1344]
ENSDART00000058210	3.33464	0.0016579	yes	complement component 3 [Source:HGNC Symbol;Acc:HGNC:1318]
ENSDART00000067322	3.31084	0.0039704	yes	F-box and leucine-rich repeat protein 14b [Source:ZFIN;Acc:ZDB-GENE-030131-3556]
ENSDART00000148386	3.31021	5.4013e-11	yes	protein arginine methyltransferase 10 (putative) [Source:ZFIN;Acc:ZDB-GENE-080728-4]
ENSDART00000131576	3.29869	0.00080928	yes	solute carrier family 25, member 32b [Source:ZFIN;Acc:ZDB-GENE-050306-39]
ENSDART00000144267	3.29043	0.0067768	yes	eukaryotic translation initiation factor 4Ba [Source:ZFIN;Acc:ZDB-GENE-060629-1]
ENSDART00000053272	3.22547	0.0013724	yes	tRNA methyltransferase 10 homolog A (S. cerevisiae) [Source:HGNC Symbol;Acc:HGNC:28403]
ENSDART00000033717	3.21763	0.0027644	yes	CASP2 and RIPK1 domain containing adaptor with death domain [Source:ZFIN;Acc:ZDB-GENE-041010-168]
ENSDART00000148712	3.21547	0.0067768	yes	ribonuclease P/MRP 30 subunit [Source:ZFIN;Acc:ZDB-GENE-050320-45]
ENSDART00000042237	3.20786	0.0067768	yes	zgc:77391 [Source:ZFIN;Acc:ZDB-GENE-040426-1830]
ENSDART00000145901	3.20023	0.0023319	yes	Ras and Rab interactor 2 [Source:ZFIN;Acc:ZDB-GENE-090312-194]
ENSDART00000143653	3.19058	3.2259e-06	yes	tetratricopeptide repeat domain 31 [Source:HGNC Symbol;Acc:HGNC:25759]
ENSDART00000141886	3.18989	0.0039704	yes	si:dkey-106c17.2 [Source:ZFIN;Acc:ZDB-GENE-060503-612]
ENSDART00000137972	3.18614	0.00099413	yes	arginine/serine-rich coiled-coil 2 [Source:ZFIN;Acc:ZDB-GENE-040426-2457]
ENSDART00000133951	3.18002	0.0023319	yes	rho/rac guanine nucleotide exchange factor (GEF) 18a [Source:ZFIN;Acc:ZDB-GENE-040516-14]
ENSDART00000150071	3.17118	0.0013724	yes	tetratricopeptide repeat domain 1 [Source:ZFIN;Acc:ZDB-GENE-041114-80]
ENSDART00000133293	3.14486	0.0016579	yes	si:dkey-177p2.16 [Source:ZFIN;Acc:ZDB-GENE-061026-1]
ENSDART00000012826	3.1412	0.0013724	yes	peroxisomal biogenesis factor 3 [Source:ZFIN;Acc:ZDB-GENE-040426-979]
ENSDART00000073440	3.14029	0.0013724	yes	DnaJ (Hsp40) homolog, subfamily A, member 4 [Source:HGNC Symbol;Acc:HGNC:14885]
ENSDART00000127266	3.12821	6.1944e-09	yes	eukaryotic translation initiation factor 2B, subunit 5 epsilon, 82kDa [Source:HGNC Symbol;Acc:HGNC:3261]
ENSDART00000144803	3.10925	0.0027644	yes	guanylate binding protein 1 [Source:ZFIN;Acc:ZDB-GENE-040718-32]
ENSDART00000148734	3.10787	0.0005961	yes	general transcription factor IIH, polypeptide 3 [Source:ZFIN;Acc:ZDB-GENE-040718-302]
ENSDART00000155317	3.10787	7.7134e-05	yes	QKI, KH domain containing, RNA binding a [Source:ZFIN;Acc:ZDB-GENE-990415-230]
ENSDART00000085642	3.10177	0.0005961	yes	diacylglycerol kinase, alpha a [Source:ZFIN;Acc:ZDB-GENE-060616-305]
ENSDART00000144044	3.04075	0.0067768	yes	glycolipid transfer protein domain containing 1 [Source:ZFIN;Acc:ZDB-GENE-040801-240]
ENSDART00000132503	3.02695	9.1102e-05	yes	small nuclear RNA activating complex, polypeptide 4 [Source:ZFIN;Acc:ZDB-GENE-030131-5794]
ENSDART00000123591	3.00347	0.0039704	yes	ubiquitin specific peptidase 48 [Source:ZFIN;Acc:ZDB-GENE-050522-197]
ENSDART00000141667	3.00187	9.1102e-05	yes	family with sequence similarity 50, member A [Source:ZFIN;Acc:ZDB-GENE-050417-110]
ENSDART00000153019	2.99296	0.00021438	yes	ribonuclease H1 [Source:ZFIN;Acc:ZDB-GENE-040718-407]
ENSDART00000146980	2.99226	0.0076791	yes	methionine adenosyltransferase II, alpha a [Source:ZFIN;Acc:ZDB-GENE-030131-2049]
ENSDART00000151436	2.99013	0.00012858	yes	N-terminal asparagine amidase [Source:ZFIN;Acc:ZDB-GENE-040426-1896]
ENSDART00000152492	2.97225	0.0027644	yes	chromosome 9 open reading frame 156 [Source:HGNC Symbol;Acc:HGNC:30967]
ENSDART00000134687	2.95734	0.00099413	yes	pseudouridine synthase 1 [Source:ZFIN;Acc:ZDB-GENE-041212-26]
ENSDART00000134495	2.93174	0.0076791	yes	Rab geranylgeranyltransferase, beta subunit [Source:ZFIN;Acc:ZDB-GENE-040426-2116]
ENSDART00000046784	2.91789	0.00059611	yes	FK506 binding protein 1Ab [Source:ZFIN;Acc:ZDB-GENE-040927-9]
ENSDART00000101949	2.90698	0.00024694	yes	sideroflexin 4 [Source:ZFIN;Acc:ZDB-GENE-050309-187]
ENSDART00000143915	2.90246	0.00099413	yes	growth arrest and DNA-damage-inducible, beta b [Source:ZFIN;Acc:ZDB-GENE-050223-1]
ENSDART00000008603	2.89554	0.0076791	yes	prolyl endopeptidase-like [Source:ZFIN;Acc:ZDB-GENE-090313-224]
ENSDART00000124269	2.87817	0.0046084	yes	spermatogenesis associated, serine-rich 2 [Source:HGNC Symbol;Acc:HGNC:18650]
ENSDART00000136974	2.87517	0.00059611	yes	si:dkeyp-51f12.3 [Source:ZFIN;Acc:ZDB-GENE-070705-547]
ENSDART00000156494	2.86707	0.0076792	yes	si:ch211-235i11.6 [Source:ZFIN;Acc:ZDB-GENE-131120-95]
ENSDART00000155514	2.84108	0.0076791	yes	lysine (K)-specific demethylase 5Ba [Source:ZFIN;Acc:ZDB-GENE-030131-5379]
ENSDART00000104657	2.83004	6.1553e-05	yes	mitochondrial ribosomal protein S21 [Source:ZFIN;Acc:ZDB-GENE-070615-13]
ENSDART00000150847	2.82677	0.0046084	yes	mitochondrial ribosomal protein S18A [Source:ZFIN;Acc:ZDB-GENE-041210-109]
ENSDART00000145730	2.77836	0.00099413	yes	akirin 2 [Source:ZFIN;Acc:ZDB-GENE-040426-2944]
ENSDART00000105955	2.76683	0.0027644	yes	translocase of inner mitochondrial membrane 21 homolog (yeast) [Source:HGNC Symbol;Acc:HGNC:25010]
ENSDART00000154975	2.76341	1.3316e-08	yes	si:ch211-147g22.4 [Source:ZFIN;Acc:ZDB-GENE-131121-226]
ENSDART00000109764	2.76189	0.0076791	yes	chromosome 12 open reading frame 45 [Source:HGNC Symbol;Acc:HGNC:28628]
ENSDART00000043930	2.75596	0.00099413	yes	bone morphogenetic protein receptor, type 1bb [Source:ZFIN;Acc:ZDB-GENE-090610-1]
ENSDART00000112746	2.74436	0.0076791	yes	zgc:171459 [Source:ZFIN;Acc:ZDB-GENE-030131-2059]
ENSDART00000114136	2.74436	0.0076791	yes	WD repeat domain 89 [Source:HGNC Symbol;Acc:HGNC:20489]
ENSDART00000151362	2.72525	0.0010946	yes	zinc finger, CCHC domain containing 10 [Source:ZFIN;Acc:ZDB-GENE-030131-6172]
ENSDART00000115005	2.66082	0.0029342	yes	Uncharacterized protein [Source:UniProtKB/TrEMBL;Acc:F1QTM7]
ENSDART00000050729	2.65457	6.1553e-05	yes	HD domain containing 2 [Source:ZFIN;Acc:ZDB-GENE-050522-394]
ENSDART00000126747	2.65204	2.3632e-07	yes	Uncharacterized protein [Source:UniProtKB/TrEMBL;Acc:F1QAB2]
ENSDART00000136218	2.6426	0.0027644	yes	cytoplasmic polyadenylation element binding protein 4 [Source:ZFIN;Acc:ZDB-GENE-040426-1557]
ENSDART00000141134	2.62044	0.00066708	yes	zgc:136474 [Source:ZFIN;Acc:ZDB-GENE-060616-210]
ENSDART00000040723	2.61871	6.1184e-07	yes	proteasome (prosome, macropain) assembly chaperone 3 [Source:ZFIN;Acc:ZDB-GENE-040718-262]
ENSDART00000059628	2.57917	0.0046084	yes	NGFI-A binding protein 1b (EGR1 binding protein 1) [Source:ZFIN;Acc:ZDB-GENE-081105-85]
ENSDART00000004756	2.57262	2.0246e-31	yes	heat shock protein 90, alpha (cytosolic), class A member 1, tandem duplicate 1 [Source:ZFIN;Acc:ZDB-GENE-990415-94]
ENSDART00000152813	2.56809	0.00040607	yes	general transcription factor IIA, 1 [Source:ZFIN;Acc:ZDB-GENE-030131-2694]
ENSDART00000110866	2.5627	0.0076791	yes	ceroid-lipofuscinosis, neuronal 5 [Source:HGNC Symbol;Acc:HGNC:2076]
ENSDART00000077383	2.55957	6.2563e-06	yes	C10orf32-ASMT readthrough (NMD candidate) [Source:HGNC Symbol;Acc:HGNC:49183]
ENSDART00000041304	2.55921	1.5589e-07	yes	APG3 autophagy 3-like [Source:ZFIN;Acc:ZDB-GENE-030131-8576]
ENSDART00000139180	2.5588	0.00010028	yes	transcription termination factor, RNA polymerase I [Source:HGNC Symbol;Acc:HGNC:12397]
ENSDART00000149092	2.55869	0.0046084	yes	glycerate kinase [Source:ZFIN;Acc:ZDB-GENE-061013-308]
ENSDART00000132808	2.55082	0.0027644	yes	N-acetylneuraminic acid phosphatase [Source:ZFIN;Acc:ZDB-GENE-050522-94]
ENSDART00000020252	2.52221	2.4091e-06	yes	protein disulfide isomerase-related protein (provisional) [Source:ZFIN;Acc:ZDB-GENE-030131-879]
ENSDART00000008047	2.5212	0.0076791	yes	WD repeat domain 24 [Source:ZFIN;Acc:ZDB-GENE-040426-2012]
ENSDART00000064603	2.50578	0.0046085	yes	phosphatidic acid phosphatase type 2 domain containing 1B [Source:ZFIN;Acc:ZDB-GENE-040704-54]
ENSDART00000131522	2.50442	0.0076792	yes	si:ch73-299h12.1 [Source:ZFIN;Acc:ZDB-GENE-081031-84]
ENSDART00000056893	2.49539	0.0076791	yes	programmed cell death 7 [Source:ZFIN;Acc:ZDB-GENE-040728-3]
ENSDART00000135399	2.48819	0.0076792	yes	PHD finger protein 11 [Source:ZFIN;Acc:ZDB-GENE-081104-417]
ENSDART00000147844	2.48793	0.00016877	yes	retinoid x receptor, beta b [Source:ZFIN;Acc:ZDB-GENE-990415-242]
ENSDART00000065036	2.48253	4.1487e-05	yes	phosphorylated adaptor for RNA export [Source:ZFIN;Acc:ZDB-GENE-040822-42]
ENSDART00000146855	2.47498	0.0027644	yes	ArfGAP with FG repeats 1b [Source:ZFIN;Acc:ZDB-GENE-040426-1520]
ENSDART00000083701	2.46919	1.6161e-05	yes	cyclin-dependent kinase 11B [Source:ZFIN;Acc:ZDB-GENE-041212-74]
ENSDART00000145053	2.46606	0.0046085	yes	transmembrane protein 144a [Source:ZFIN;Acc:ZDB-GENE-040822-12]
ENSDART00000155915	2.46057	0.0078035	yes	S-adenosylhomocysteine hydrolase-like 2 [Source:ZFIN;Acc:ZDB-GENE-040115-5]
ENSDART00000051770	2.45271	0.00016317	yes	family with sequence similarity 203, member A [Source:ZFIN;Acc:ZDB-GENE-040718-228]
ENSDART00000066424	2.45009	0.00026512	yes	protein O-fucosyltransferase 2 [Source:ZFIN;Acc:ZDB-GENE-030131-3595]
ENSDART00000147900	2.44425	1.6216e-06	yes	RNA methyltransferase like 1a [Source:ZFIN;Acc:ZDB-GENE-050417-184]
ENSDART00000139449	2.44359	4.2672e-09	yes	si:dkey-147f3.4 [Source:ZFIN;Acc:ZDB-GENE-061009-29]
ENSDART00000157346	2.41507	0.0076792	yes	si:ch211-261d7.3 [Source:ZFIN;Acc:ZDB-GENE-131121-179]
ENSDART00000133576	2.41165	0.00043397	yes	nicotinamide nucleotide adenylyltransferase 1 [Source:ZFIN;Acc:ZDB-GENE-050417-101]
ENSDART00000134976	2.40148	0.0078035	yes	si:ch73-382f3.1 [Source:ZFIN;Acc:ZDB-GENE-030131-9513]
ENSDART00000145042	2.37426	0.0078035	yes	ribonuclease H2, subunit B [Source:ZFIN;Acc:ZDB-GENE-040426-1090]
ENSDART00000020817	2.37362	6.5119e-05	yes	NudC domain containing 3 [Source:ZFIN;Acc:ZDB-GENE-040426-2255]
ENSDART00000155927	2.36884	0.00016877	yes	chromosome 12 open reading frame 73 [Source:HGNC Symbol;Acc:HGNC:34450]
ENSDART00000149807	2.36391	0.0017936	yes	ornithine decarboxylase 1 [Source:ZFIN;Acc:ZDB-GENE-010816-1]
ENSDART00000143827	2.36274	0.0011253	yes	kaptin (actin binding protein) [Source:ZFIN;Acc:ZDB-GENE-040801-258]
ENSDART00000148828	2.36271	0.0018142	yes	phosphatidylinositol binding clathrin assembly protein a [Source:ZFIN;Acc:ZDB-GENE-040426-761]
ENSDART00000125497	2.35739	0.00043397	yes	Uncharacterized protein [Source:UniProtKB/TrEMBL;Acc:E7F7R1]
ENSDART00000131753	2.34887	0.00026512	yes	phosphofructokinase, platelet a [Source:ZFIN;Acc:ZDB-GENE-091112-22]
ENSDART00000099121	2.34854	6.6094e-08	yes	ADP-ribosylation factor-like 8 [Source:ZFIN;Acc:ZDB-GENE-030131-5762]
ENSDART00000082362	2.33667	0.00069346	yes	male germ cell-associated kinase [Source:ZFIN;Acc:ZDB-GENE-030131-7279]
ENSDART00000134413	2.33317	0.002917	yes	progesterone immunomodulatory binding factor 1 [Source:ZFIN;Acc:ZDB-GENE-040801-94]
ENSDART00000148596	2.31427	0.0011253	yes	growth arrest and DNA-damage-inducible, alpha, b [Source:ZFIN;Acc:ZDB-GENE-040704-60]
ENSDART00000085247	2.31301	0.0047907	yes	anaphase promoting complex subunit 15 [Source:ZFIN;Acc:ZDB-GENE-060825-43]
ENSDART00000028105	2.3057	0.00016877	yes	microfibrillar-associated protein 1 [Source:ZFIN;Acc:ZDB-GENE-040426-1075]
ENSDART00000011397	2.29568	0.0011253	yes	carboxypeptidase A2 (pancreatic) [Source:ZFIN;Acc:ZDB-GENE-040801-182]
ENSDART00000055844	2.28729	0.0076792	yes	chitinase domain containing 1 [Source:ZFIN;Acc:ZDB-GENE-030131-9169]
ENSDART00000149049	2.28506	0.0076792	yes	heparin-binding EGF-like growth factor a [Source:ZFIN;Acc:ZDB-GENE-080204-119]
ENSDART00000115038	2.27949	2.6087e-05	yes	Uncharacterized protein [Source:UniProtKB/TrEMBL;Acc:E7F2W6]
ENSDART00000136735	2.27902	0.0047908	yes	RNA binding motif protein 39a [Source:ZFIN;Acc:ZDB-GENE-040426-2852]
ENSDART00000103267	2.26314	6.6295e-05	yes	family with sequence similarity 212, member Ab [Source:ZFIN;Acc:ZDB-GENE-030131-5539]
ENSDART00000140507	2.25262	0.00069641	yes	karyopherin (importin) beta 3 [Source:ZFIN;Acc:ZDB-GENE-030424-2]
ENSDART00000123476	2.24816	0.00027093	yes	lectin, mannose-binding, 1 [Source:ZFIN;Acc:ZDB-GENE-060201-4]
ENSDART00000130052	2.24798	9.8945e-24	yes	bridging integrator 3 [Source:HGNC Symbol;Acc:HGNC:1054]
ENSDART00000078858	2.24768	0.00069346	yes	si:ch211-154o6.6 [Source:ZFIN;Acc:ZDB-GENE-060503-576]
ENSDART00000145118	2.24316	2.5623e-05	yes	COMM domain containing 5 [Source:ZFIN;Acc:ZDB-GENE-040801-71]
ENSDART00000155364	2.23355	0.0076792	yes	si:dkey-3p4.7 [Source:ZFIN;Acc:ZDB-GENE-131119-47]
ENSDART00000139367	2.21908	0.00042292	yes	angiomotin like 2a [Source:ZFIN;Acc:ZDB-GENE-030131-9770]
ENSDART00000127040	2.21899	0.00026709	yes	Uncharacterized protein [Source:UniProtKB/TrEMBL;Acc:E7F190]
ENSDART00000077386	2.21804	4.1143e-07	yes	protease, serine, 16 (thymus) [Source:ZFIN;Acc:ZDB-GENE-070112-732]
ENSDART00000074283	2.21761	0.00016824	yes	histamine receptor H1 [Source:ZFIN;Acc:ZDB-GENE-070531-3]
ENSDART00000139039	2.20169	0.0046756	yes	si:ch211-106h4.4 [Source:ZFIN;Acc:ZDB-GENE-070705-14]
ENSDART00000121655	2.19459	0.00010573	yes	DnaJ (Hsp40) homolog, subfamily B, member 6a [Source:ZFIN;Acc:ZDB-GENE-040718-45]
ENSDART00000075538	2.19423	4.0314e-05	yes	F-box protein 22 [Source:ZFIN;Acc:ZDB-GENE-040724-68]
ENSDART00000142428	2.19112	0.0074681	yes	Josephin domain containing 2 [Source:ZFIN;Acc:ZDB-GENE-040426-850]
ENSDART00000023549	2.18319	1.8929e-12	yes	prohibitin 2b [Source:ZFIN;Acc:ZDB-GENE-040718-430]
ENSDART00000021037	2.17958	1.2994e-21	yes	heat shock protein 4a [Source:ZFIN;Acc:ZDB-GENE-040426-2832]
ENSDART00000004920	2.17821	1.0071e-07	yes	small glutamine-rich tetratricopeptide repeat (TPR)-containing, alpha [Source:HGNC Symbol;Acc:HGNC:10819]
ENSDART00000063525	2.17203	0.0001035	yes	calreticulin [Source:ZFIN;Acc:ZDB-GENE-000208-17]
ENSDART00000021736	2.16921	0.00010573	yes	short coiled-coil protein b [Source:ZFIN;Acc:ZDB-GENE-041010-41]
ENSDART00000151784	2.15804	2.6337e-10	yes	prothymosin, alpha a [Source:ZFIN;Acc:ZDB-GENE-030131-7647]
ENSDART00000124032	2.14935	2.4673e-05	yes	SERPINE1 mRNA binding protein 1 [Source:HGNC Symbol;Acc:HGNC:17860]
ENSDART00000121626	2.14747	0.0027807	yes	WD repeat domain 70 [Source:HGNC Symbol;Acc:HGNC:25495]
ENSDART00000064463	2.14456	0.001756	yes	translocase of inner mitochondrial membrane 10 homolog B (yeast) [Source:ZFIN;Acc:ZDB-GENE-050417-370]
ENSDART00000100240	2.14069	0.0018142	yes	RNA methyltransferase like 1b [Source:ZFIN;Acc:ZDB-GENE-030131-158]
ENSDART00000127990	2.13782	1.0054e-05	yes	branched chain keto acid dehydrogenase E1, beta polypeptide [Source:HGNC Symbol;Acc:HGNC:987]
ENSDART00000149010	2.12997	0.0047908	yes	haptoglobin [Source:ZFIN;Acc:ZDB-GENE-030131-1259]
ENSDART00000150810	2.12962	0.0074681	yes	short chain dehydrogenase/reductase family 39U, member 1 [Source:ZFIN;Acc:ZDB-GENE-060929-104]
ENSDART00000053609	2.12812	0.00066778	yes	dolichyl pyrophosphate phosphatase 1 [Source:ZFIN;Acc:ZDB-GENE-041024-11]
ENSDART00000155189	2.12207	0.0074682	yes	PDZ and LIM domain 2 (mystique) [Source:ZFIN;Acc:ZDB-GENE-070308-4]
ENSDART00000020665	2.12058	0.0018142	yes	small glutamine-rich tetratricopeptide repeat (TPR)-containing, beta [Source:ZFIN;Acc:ZDB-GENE-040704-72]
ENSDART00000005326	2.10709	0.0046756	yes	tetratricopeptide repeat domain 5 [Source:ZFIN;Acc:ZDB-GENE-050417-137]
ENSDART00000128647	2.09926	0.0078036	yes	chromosome 17 open reading frame 62 [Source:HGNC Symbol;Acc:HGNC:28672]
ENSDART00000136104	2.0991	0.002917	yes	si:ch211-148l7.4 [Source:ZFIN;Acc:ZDB-GENE-090313-38]
ENSDART00000034768	2.09423	0.0078036	yes	growth hormone inducible transmembrane protein [Source:ZFIN;Acc:ZDB-GENE-040426-1537]
ENSDART00000146234	2.07896	0.00025631	yes	apoptogenic 1, mitochondrial [Source:ZFIN;Acc:ZDB-GENE-090313-66]
ENSDART00000041992	2.07394	1.5615e-06	yes	dehydrogenase/reductase (SDR family) member 12 [Source:ZFIN;Acc:ZDB-GENE-060929-1134]
ENSDART00000146974	2.06834	0.0047908	yes	chimerin (chimaerin) 2 [Source:ZFIN;Acc:ZDB-GENE-091020-5]
ENSDART00000143073	2.06436	0.0046756	yes	tripartite motif containing 35-28 [Source:ZFIN;Acc:ZDB-GENE-071004-19]
ENSDART00000125257	2.05499	0.0078036	yes	suppressor of var1, 3-like 1 (S. cerevisiae) [Source:ZFIN;Acc:ZDB-GENE-030131-2838]
ENSDART00000123662	2.04377	4.0517e-12	yes	tumor susceptibility 101 [Source:HGNC Symbol;Acc:HGNC:15971]
ENSDART00000121679	2.03949	0.00062742	yes	wu:fj13e08 [Source:ZFIN;Acc:ZDB-GENE-030131-7388]
ENSDART00000097531	2.03231	5.5872e-07	yes	translocase of outer mitochondrial membrane 7 homolog (yeast) [Source:ZFIN;Acc:ZDB-GENE-060825-115]
ENSDART00000130521	2.02695	0.0074681	yes	calcium channel flower domain containing 1 [Source:HGNC Symbol;Acc:HGNC:1365]
ENSDART00000145631	2.0241	0.0078036	yes	transcobalamin II, like [Source:ZFIN;Acc:ZDB-GENE-030131-4648]
ENSDART00000142567	2.01487	0.0046757	yes	angel homolog 2 (Drosophila) [Source:ZFIN;Acc:ZDB-GENE-030131-6498]
ENSDART00000150669	2.01277	0.004387	yes	muskelin 1, intracellular mediator containing kelch motifs [Source:ZFIN;Acc:ZDB-GENE-030131-3942]
ENSDART00000031153	2.01002	1.4154e-05	yes	coiled-coil domain containing 174 [Source:ZFIN;Acc:ZDB-GENE-050320-54]
ENSDART00000135590	2.00779	0.0010511	yes	family with sequence similarity 192, member A [Source:ZFIN;Acc:ZDB-GENE-030131-6692]
ENSDART00000074272	2.00503	0.00025632	yes	im:6904045 [Source:ZFIN;Acc:ZDB-GENE-050506-75]
ENSDART00000141369	1.99957	0.002917	yes	N-myc downstream regulated gene 2 [Source:ZFIN;Acc:ZDB-GENE-041212-15]
ENSDART00000146144	1.99893	0.004387	yes	opa interacting protein 5 [Source:ZFIN;Acc:ZDB-GENE-090313-328]
ENSDART00000099990	1.99182	0.0074681	yes	BTB (POZ) domain containing 9 [Source:ZFIN;Acc:ZDB-GENE-040704-39]
ENSDART00000143004	1.99167	0.0010511	yes	si:ch73-299h12.3 [Source:ZFIN;Acc:ZDB-GENE-081031-93]
ENSDART00000145256	1.98724	0.004387	yes	superkiller viralicidic activity 2 (S. cerevisiae homolog)-like [Source:ZFIN;Acc:ZDB-GENE-010430-5]
ENSDART00000066198	1.98124	0.00024093	yes	RAB9A, member RAS oncogene family [Source:ZFIN;Acc:ZDB-GENE-060825-293]
ENSDART00000113120	1.97547	0.0078036	yes	TAF6-like RNA polymerase II, p300/CBP-associated factor (PCAF)-associated factor [Source:ZFIN;Acc:ZDB-GENE-030131-6789]
ENSDART00000126079	1.97036	0.0027807	yes	chromatin target of PRMT1a [Source:ZFIN;Acc:ZDB-GENE-030131-210]
ENSDART00000038836	1.967	0.001756	yes	chromosome 11 open reading frame 54 [Source:HGNC Symbol;Acc:HGNC:30204]
ENSDART00000134115	1.9662	0.0010511	yes	chromosome 22 open reading frame 39 [Source:HGNC Symbol;Acc:HGNC:27012]
ENSDART00000043317	1.96139	5.6016e-05	yes	translocase of inner mitochondrial membrane 8 homolog A (yeast) [Source:ZFIN;Acc:ZDB-GENE-040801-158]
ENSDART00000088800	1.96108	0.004387	yes	phosphopantothenoylcysteine synthetase [Source:ZFIN;Acc:ZDB-GENE-060512-104]
ENSDART00000101120	1.95891	0.0016489	yes	zgc:92664 [Source:ZFIN;Acc:ZDB-GENE-040718-119]
ENSDART00000004879	1.95749	1.3104e-29	yes	heat shock protein 90, beta (grp94), member 1 [Source:ZFIN;Acc:ZDB-GENE-031002-1]
ENSDART00000064754	1.95023	0.00066779	yes	zinc finger protein 593 [Source:ZFIN;Acc:ZDB-GENE-040426-1789]
ENSDART00000125971	1.93834	7.2531e-14	yes	glypican 1b [Source:ZFIN;Acc:ZDB-GENE-040426-1306]
ENSDART00000088488	1.93446	0.00040165	yes	optic atrophy 3 [Source:ZFIN;Acc:ZDB-GENE-050210-1]
ENSDART00000112999	1.92688	0.0016489	yes	chromosome 1 open reading frame 131 [Source:HGNC Symbol;Acc:HGNC:25332]
ENSDART00000109882	1.91314	0.001515	yes	LYR motif containing 7 [Source:HGNC Symbol;Acc:HGNC:28072]
ENSDART00000032877	1.90814	0.00097677	yes	INO80 complex subunit E [Source:ZFIN;Acc:ZDB-GENE-040426-1818]
ENSDART00000130490	1.90049	0.00057865	yes	N(alpha)-acetyltransferase 15, NatA auxiliary subunit b [Source:ZFIN;Acc:ZDB-GENE-030131-6031]
ENSDART00000144820	1.89688	0.0074682	yes	ecotropic viral integration site 5b [Source:ZFIN;Acc:ZDB-GENE-041111-244]
ENSDART00000138558	1.89488	0.0040098	yes	interleukin enhancer binding factor 3a [Source:ZFIN;Acc:ZDB-GENE-030131-3151]
ENSDART00000114613	1.89426	0.0074682	yes	pentatricopeptide repeat domain 1 [Source:ZFIN;Acc:ZDB-GENE-030131-6146]
ENSDART00000102555	1.89219	0.0040098	yes	ARP2 actin-related protein 2b homolog (yeast) [Source:ZFIN;Acc:ZDB-GENE-050410-4]
ENSDART00000100879	1.89151	0.004387	yes	zgc:171310 [Source:ZFIN;Acc:ZDB-GENE-070822-11]
ENSDART00000035628	1.88464	0.0068915	yes	serine/arginine-rich splicing factor 10 [Source:HGNC Symbol;Acc:HGNC:16713]
ENSDART00000114563	1.88152	0.0010511	yes	transmembrane protein 129 [Source:ZFIN;Acc:ZDB-GENE-040426-2796]
ENSDART00000100876	1.87524	0.0010511	yes	LOC559695 protein; Uncharacterized protein [Source:UniProtKB/TrEMBL;Acc:Q08BD3]
ENSDART00000151664	1.87239	0.00062743	yes	NOP58 ribonucleoprotein homolog (yeast) [Source:ZFIN;Acc:ZDB-GENE-040426-2140]
ENSDART00000102143	1.86492	2.9449e-07	yes	COX17 cytochrome c oxidase assembly homolog (S. cerevisiae) [Source:ZFIN;Acc:ZDB-GENE-040912-91]
ENSDART00000011596	1.85582	0.0062109	yes	potassium channel tetramerisation domain containing 10 [Source:ZFIN;Acc:ZDB-GENE-040426-2843]
ENSDART00000103264	1.85147	2.0194e-05	yes	Uncharacterized protein [Source:UniProtKB/TrEMBL;Acc:H9GXR5]
ENSDART00000058724	1.84398	7.9108e-05	yes	family with sequence similarity 136, member A [Source:ZFIN;Acc:ZDB-GENE-040426-2729]
ENSDART00000149325	1.84149	0.0068915	yes	inositol polyphosphate-5-phosphatase B [Source:ZFIN;Acc:ZDB-GENE-110411-228]
ENSDART00000092258	1.8403	0.00097679	yes	spermatogenesis associated 2 [Source:ZFIN;Acc:ZDB-GENE-070822-5]
ENSDART00000144149	1.83508	0.00034297	yes	angiopoietin-like 4 [Source:ZFIN;Acc:ZDB-GENE-041111-222]
ENSDART00000051664	1.83394	0.00034297	yes	yippee-like 1 (Drosophila) [Source:ZFIN;Acc:ZDB-GENE-040808-41]
ENSDART00000121946	1.83171	0.0062109	yes	calcitonin gene-related peptide-receptor component protein [Source:ZFIN;Acc:ZDB-GENE-060825-150]
ENSDART00000122249	1.82539	5.4632e-11	yes	topoisomerase (DNA) I, like [Source:ZFIN;Acc:ZDB-GENE-060616-217]
ENSDART00000136519	1.8234	0.00034297	yes	transmembrane protein 59 [Source:ZFIN;Acc:ZDB-GENE-070912-397]
ENSDART00000147115	1.81726	2.1652e-08	yes	ribosome production factor 1 homolog (S. cerevisiae) [Source:ZFIN;Acc:ZDB-GENE-040625-177]
ENSDART00000028500	1.81583	0.0040098	yes	nucleoredoxin [Source:ZFIN;Acc:ZDB-GENE-050522-75]
ENSDART00000151396	1.81333	0.0025768	yes	nitric oxide synthase interacting protein [Source:ZFIN;Acc:ZDB-GENE-041114-146]
ENSDART00000140229	1.81246	0.004387	yes	OTU domain, ubiquitin aldehyde binding 1a [Source:ZFIN;Acc:ZDB-GENE-040718-108]
ENSDART00000152401	1.8116	5.6561e-07	yes	acidic (leucine-rich) nuclear phosphoprotein 32 family, member B [Source:ZFIN;Acc:ZDB-GENE-030131-719]
ENSDART00000026020	1.80949	0.0062109	yes	WD repeat domain 54 [Source:ZFIN;Acc:ZDB-GENE-040801-151]
ENSDART00000057945	1.80943	0.0062109	yes	ATPase, H+ transporting, lysosomal 9kDa, V0 subunit e1 [Source:ZFIN;Acc:ZDB-GENE-041010-133]
ENSDART00000122277	1.80867	5.1662e-05	yes	Uncharacterized protein [Source:UniProtKB/TrEMBL;Acc:E7EXT4]
ENSDART00000062895	1.8027	0.0062109	yes	signal recognition particle 9 [Source:ZFIN;Acc:ZDB-GENE-040426-1106]
ENSDART00000145317	1.80269	0.0013699	yes	zgc:153952 [Source:ZFIN;Acc:ZDB-GENE-061103-427]
ENSDART00000148366	1.80134	0.0023403	yes	CCR4-NOT transcription complex, subunit 2 [Source:ZFIN;Acc:ZDB-GENE-070410-70]
ENSDART00000105533	1.80044	0.00057866	yes	ENTH domain containing 2 [Source:ZFIN;Acc:ZDB-GENE-100716-1]
ENSDART00000148540	1.78609	0.0040098	yes	ferrochelatase [Source:ZFIN;Acc:ZDB-GENE-000928-1]
ENSDART00000051312	1.78411	0.0062109	yes	tetratricopeptide repeat domain 33 [Source:ZFIN;Acc:ZDB-GENE-040718-480]
ENSDART00000002459	1.78351	0.0020947	yes	cystinosis, nephropathic [Source:ZFIN;Acc:ZDB-GENE-050522-352]
ENSDART00000061679	1.78164	0.0035991	yes	DNA methyltransferase 1 associated protein 1 [Source:ZFIN;Acc:ZDB-GENE-040426-748]
ENSDART00000101405	1.77535	0.0020947	yes	dimethylarginine dimethylaminohydrolase 1 [Source:HGNC Symbol;Acc:HGNC:2715]
ENSDART00000005906	1.77299	0.0035991	yes	serine/threonine kinase 38a [Source:ZFIN;Acc:ZDB-GENE-040426-2811]
ENSDART00000040032	1.77166	0.00080391	yes	reticulon 4 interacting protein 1 [Source:ZFIN;Acc:ZDB-GENE-040426-1314]
ENSDART00000082512	1.76906	0.0020947	yes	transmembrane protein 167B [Source:ZFIN;Acc:ZDB-GENE-040808-17]
ENSDART00000104599	1.75818	0.00027874	yes	proteasome (prosome, macropain) 26S subunit, non-ATPase, 13 [Source:ZFIN;Acc:ZDB-GENE-040426-1004]
ENSDART00000149022	1.74609	0.0023403	yes	Rho GTPase activating protein 10 [Source:ZFIN;Acc:ZDB-GENE-060512-221]
ENSDART00000123107	1.74429	0.00020344	yes	Uncharacterized protein [Source:UniProtKB/TrEMBL;Acc:H9GYU2]
ENSDART00000092082	1.74392	1.7759e-08	yes	mesencephalic astrocyte-derived neurotrophic factor [Source:ZFIN;Acc:ZDB-GENE-060929-640]
ENSDART00000104708	1.74257	0.0040099	yes	abhydrolase domain containing 12 [Source:ZFIN;Acc:ZDB-GENE-060929-268]
ENSDART00000101304	1.72576	0.0095702	yes	ATG12 autophagy related 12 homolog (S. cerevisiae) [Source:ZFIN;Acc:ZDB-GENE-071205-7]
ENSDART00000039847	1.71641	0.0095702	yes	coiled-coil-helix-coiled-coil-helix domain containing 4 [Source:ZFIN;Acc:ZDB-GENE-040801-46]
ENSDART00000103911	1.71219	0.0095702	yes	Uncharacterized protein [Source:UniProtKB/TrEMBL;Acc:F1QY11]
ENSDART00000146085	1.71105	0.0020947	yes	transmembrane protein 261 [Source:HGNC Symbol;Acc:HGNC:30536]
ENSDART00000149725	1.71003	0.0023404	yes	activating transcription factor 7 interacting protein [Source:ZFIN;Acc:ZDB-GENE-061103-178]
ENSDART00000052061	1.70656	3.0039e-20	yes	calponin 2 [Source:ZFIN;Acc:ZDB-GENE-030131-542]
ENSDART00000133960	1.70079	0.0068916	yes	XIAP associated factor 1 [Source:HGNC Symbol;Acc:HGNC:30932]
ENSDART00000153230	1.69752	0.0020947	yes	ribosomal protein L7-like 1 [Source:ZFIN;Acc:ZDB-GENE-030131-970]
ENSDART00000146475	1.69216	0.0020947	yes	topoisomerase (DNA) I [Source:ZFIN;Acc:ZDB-GENE-030131-5390]
ENSDART00000011577	1.6842	0.0035991	yes	BTB (POZ) domain containing 10b [Source:ZFIN;Acc:ZDB-GENE-080104-5]
ENSDART00000110112	1.68194	4.591e-07	yes	late endosomal/lysosomal adaptor, MAPK and MTOR activator 1 [Source:ZFIN;Acc:ZDB-GENE-130819-1]
ENSDART00000075146	1.68141	0.0003725	yes	asparagine-linked glycosylation 3 homolog (S. cerevisiae, alpha-1,3-mannosyltransferase) [Source:ZFIN;Acc:ZDB-GENE-050522-334]
ENSDART00000028954	1.67763	0.006211	yes	Rab interacting lysosomal protein-like 2 [Source:ZFIN;Acc:ZDB-GENE-030131-6682]
ENSDART00000139469	1.67506	0.0012236	yes	cleavage and polyadenylation specific factor 3 [Source:ZFIN;Acc:ZDB-GENE-030131-3275]
ENSDART00000022506	1.67459	7.1961e-06	yes	RAB3A interacting protein (rabin3)-like 1 [Source:HGNC Symbol;Acc:HGNC:9780]
ENSDART00000121691	1.66915	0.0031883	yes	solute carrier family 35, member C1 [Source:ZFIN;Acc:ZDB-GENE-041212-11]
ENSDART00000003428	1.66644	2.8908e-11	yes	phosphoribosyl pyrophosphate synthetase 1A [Source:ZFIN;Acc:ZDB-GENE-011212-5]
ENSDART00000002075	1.66438	0.0095702	yes	retinol dehydrogenase 13 (all-trans/9-cis) [Source:HGNC Symbol;Acc:HGNC:19978]
ENSDART00000018868	1.6634	0.0027971	yes	protein disulfide isomerase associated 4 [Source:ZFIN;Acc:ZDB-GENE-030131-5493]
ENSDART00000131637	1.65959	0.00071696	yes	paired related homeobox 1b [Source:ZFIN;Acc:ZDB-GENE-030131-9033]
ENSDART00000126505	1.65294	0.0031883	yes	chromosome 16 open reading frame 52 [Source:HGNC Symbol;Acc:HGNC:27087]
ENSDART00000020386	1.65234	0.0031883	yes	glutamate-cysteine ligase, modifier subunit [Source:ZFIN;Acc:ZDB-GENE-030131-5906]
ENSDART00000129135	1.64843	0.0018543	yes	reversion-inducing-cysteine-rich protein with kazal motifs [Source:HGNC Symbol;Acc:HGNC:11345]
ENSDART00000038648	1.64816	0.0095703	yes	polypyrimidine tract binding protein 2b [Source:ZFIN;Acc:ZDB-GENE-060810-49]
ENSDART00000100100	1.64118	9.2385e-34	yes	Uncharacterized protein [Source:UniProtKB/TrEMBL;Acc:E7FDI6]
ENSDART00000149421	1.63396	0.00032741	yes	replication protein A2 [Source:ZFIN;Acc:ZDB-GENE-010131-3]
ENSDART00000111464	1.63228	0.00071697	yes	tryptophanyl-tRNA synthetase [Source:HGNC Symbol;Acc:HGNC:12729]
ENSDART00000124437	1.63174	8.6548e-05	yes	NADH dehydrogenase (ubiquinone) 1 alpha subcomplex, 1 [Source:ZFIN;Acc:ZDB-GENE-040625-168]
ENSDART00000138037	1.62703	0.0055079	yes	procollagen-lysine, 2-oxoglutarate 5-dioxygenase 3 [Source:HGNC Symbol;Acc:HGNC:9083]
ENSDART00000041249	1.61644	0.0083837	yes	cysteine and histidine-rich domain (CHORD) containing 1a [Source:ZFIN;Acc:ZDB-GENE-050626-79]
ENSDART00000086060	1.6143	0.0055079	yes	mitochondrial ribosomal protein L22 [Source:ZFIN;Acc:ZDB-GENE-080303-28]
ENSDART00000007783	1.61413	0.00032741	yes	eukaryotic elongation factor, selenocysteine-tRNA-specific [Source:ZFIN;Acc:ZDB-GENE-051120-72]
ENSDART00000055380	1.61381	3.8026e-06	yes	tubulin, beta 5 [Source:ZFIN;Acc:ZDB-GENE-031110-4]
ENSDART00000057565	1.61257	0.006211	yes	chromosome 6 open reading frame 57 [Source:HGNC Symbol;Acc:HGNC:20957]
ENSDART00000138516	1.60952	0.0010826	yes	ubiquitin-fold modifier 1 [Source:ZFIN;Acc:ZDB-GENE-040426-2930]
ENSDART00000097469	1.60026	0.0031884	yes	ferredoxin 1-like [Source:ZFIN;Acc:ZDB-GENE-060929-1046]
ENSDART00000053129	1.60013	1.4038e-05	yes	small nuclear ribonucleoprotein polypeptide F [Source:ZFIN;Acc:ZDB-GENE-040930-9]
ENSDART00000015046	1.59677	0.00019285	yes	follistatin-like 1a [Source:ZFIN;Acc:ZDB-GENE-030131-4148]
ENSDART00000099417	1.59658	0.0048289	yes	Uncharacterized protein [Source:UniProtKB/TrEMBL;Acc:F1RBB2]
ENSDART00000078488	1.59519	4.5295e-05	yes	gremlin 2, DAN family BMP antagonist [Source:HGNC Symbol;Acc:HGNC:17655]
ENSDART00000148207	1.59306	0.0095703	yes	nuclear autoantigenic sperm protein (histone-binding) [Source:ZFIN;Acc:ZDB-GENE-030131-5511]
ENSDART00000133820	1.58103	0.0003725	yes	dual specificity phosphatase 6 [Source:ZFIN;Acc:ZDB-GENE-030613-1]
ENSDART00000073705	1.57977	1.0531e-06	yes	ATP-binding cassette, sub-family F (GCN20), member 1 [Source:ZFIN;Acc:ZDB-GENE-050517-31]
ENSDART00000054205	1.57517	1.7975e-11	yes	NADH dehydrogenase (ubiquinone) 1 beta subcomplex, 6 [Source:ZFIN;Acc:ZDB-GENE-040426-1781]
ENSDART00000114415	1.56597	1.5947e-05	yes	activating signal cointegrator 1 complex subunit 1 [Source:ZFIN;Acc:ZDB-GENE-050417-80]
ENSDART00000144475	1.56203	0.0036272	yes	clathrin, light chain (Lca) [Source:ZFIN;Acc:ZDB-GENE-040426-1986]
ENSDART00000063287	1.56202	0.0083838	yes	queuine tRNA-ribosyltransferase 1 [Source:ZFIN;Acc:ZDB-GENE-040426-1625]
ENSDART00000022765	1.56192	0.0041983	yes	RIO kinase 1 (yeast) [Source:ZFIN;Acc:ZDB-GENE-040426-1927]
ENSDART00000041895	1.55938	0.0062671	yes	SSU72 RNA polymerase II CTD phosphatase homolog (S. cerevisiae) [Source:ZFIN;Acc:ZDB-GENE-040426-1689]
ENSDART00000054848	1.55832	0.0048289	yes	phosphomannomutase 2 [Source:ZFIN;Acc:ZDB-GENE-030722-6]
ENSDART00000002029	1.55655	0.0016278	yes	FK506 binding protein 8 [Source:ZFIN;Acc:ZDB-GENE-040426-1849]
ENSDART00000123722	1.55612	0.0095704	yes	muscle segment homeobox D [Source:ZFIN;Acc:ZDB-GENE-980526-492]
ENSDART00000153334	1.5535	2.0732e-05	yes	serine incorporator 1 [Source:ZFIN;Acc:ZDB-GENE-030131-4415]
ENSDART00000143556	1.5432	0.0005572	yes	hydroxyacyl-Coenzyme A dehydrogenase [Source:ZFIN;Acc:ZDB-GENE-040801-261]
ENSDART00000059209	1.54126	0.0072738	yes	WD repeat and FYVE domain containing 2 [Source:ZFIN;Acc:ZDB-GENE-041111-211]
ENSDART00000059800	1.53648	0.0072737	yes	lactamase, beta [Source:ZFIN;Acc:ZDB-GENE-020111-1]
ENSDART00000097198	1.53632	8.6968e-05	yes	sc:d217 [Source:ZFIN;Acc:ZDB-GENE-080303-15]
ENSDART00000137274	1.53455	0.0095703	yes	ST3 beta-galactoside alpha-2,3-sialyltransferase 5 [Source:ZFIN;Acc:ZDB-GENE-060322-1]
ENSDART00000105898	1.53379	0.0072737	yes	thiosulfate sulfurtransferase (rhodanese)-like domain containing 1 [Source:HGNC Symbol;Acc:HGNC:35410]
ENSDART00000018895	1.53258	0.0016278	yes	serrate RNA effector molecule homolog (Arabidopsis) [Source:ZFIN;Acc:ZDB-GENE-020419-13]
ENSDART00000134245	1.53204	0.0021093	yes	glutaryl-Coenzyme A dehydrogenase [Source:ZFIN;Acc:ZDB-GENE-040426-1855]
ENSDART00000150919	1.53139	0.00095084	yes	si:ch211-191i18.2 [Source:ZFIN;Acc:ZDB-GENE-060503-769]
ENSDART00000146749	1.53111	0.00095084	yes	ras homolog gene family, member Aa [Source:ZFIN;Acc:ZDB-GENE-040426-2150]
ENSDART00000145896	1.52965	0.0072738	yes	si:dkey-57k2.7 [Source:ZFIN;Acc:ZDB-GENE-070912-559]
ENSDART00000142908	1.52711	0.00021642	yes	syntaxin 12 [Source:ZFIN;Acc:ZDB-GENE-040625-11]
ENSDART00000154061	1.5229	0.00048692	yes	si:zfos-332c3.1 [Source:ZFIN;Acc:ZDB-GENE-131127-543]
ENSDART00000062348	1.52224	0.0012313	yes	mitochondrial ribosomal protein S24 [Source:ZFIN;Acc:ZDB-GENE-050522-393]
ENSDART00000089689	1.52161	0.00021643	yes	mitochondrial ribosomal protein S5 [Source:ZFIN;Acc:ZDB-GENE-060929-264]
ENSDART00000011337	1.52142	0.0012313	yes	surfeit 1 [Source:ZFIN;Acc:ZDB-GENE-041108-2]
ENSDART00000133845	1.52079	0.00083011	yes	serpin peptidase inhibitor, clade H (heat shock protein 47), member 1b [Source:ZFIN;Acc:ZDB-GENE-990415-93]
ENSDART00000138235	1.51852	3.053e-05	yes	general transcription factor IIE, polypeptide 2, beta [Source:ZFIN;Acc:ZDB-GENE-030131-6794]
ENSDART00000008554	1.50949	0.00021642	yes	La ribonucleoprotein domain family, member 7 [Source:ZFIN;Acc:ZDB-GENE-030131-6896]
ENSDART00000073459	1.50937	4.7645e-08	yes	bolA family member 2B [Source:HGNC Symbol;Acc:HGNC:32479]
ENSDART00000149196	1.50925	0.0027972	yes	OTU domain containing 6B [Source:ZFIN;Acc:ZDB-GENE-040426-974]
ENSDART00000010104	1.50629	2.3112e-05	yes	cartilage associated protein [Source:ZFIN;Acc:ZDB-GENE-040426-2619]
ENSDART00000012963	1.49686	8.1807e-06	yes	trafficking protein particle complex 6b [Source:ZFIN;Acc:ZDB-GENE-041010-122]
ENSDART00000023484	1.49665	0.0053722	yes	solute carrier family 10, member 7 [Source:ZFIN;Acc:ZDB-GENE-040801-5]
ENSDART00000135700	1.49663	0.0062671	yes	septin 6 [Source:ZFIN;Acc:ZDB-GENE-030131-1414]
ENSDART00000079559	1.48037	0.002436	yes	si:ch211-240h7.2 [Source:ZFIN;Acc:ZDB-GENE-131120-86]
ENSDART00000061756	1.48004	0.0053722	yes	si:dkey-51e6.1 [Source:ZFIN;Acc:ZDB-GENE-041014-198]
ENSDART00000043466	1.47914	0.0041983	yes	Uncharacterized protein [Source:UniProtKB/TrEMBL;Acc:E7EXH5]
ENSDART00000139079	1.47683	0.0041983	yes	serine/arginine-rich splicing factor 6b [Source:ZFIN;Acc:ZDB-GENE-041219-1]
ENSDART00000145987	1.47388	0.0072738	yes	dynamin 1-like [Source:ZFIN;Acc:ZDB-GENE-040426-1556]
ENSDART00000024858	1.46506	2.3113e-05	yes	coiled-coil-helix-coiled-coil-helix domain containing 10 [Source:ZFIN;Acc:ZDB-GENE-040426-1753]
ENSDART00000011287	1.46355	0.0018182	yes	aquaporin 4 [Source:ZFIN;Acc:ZDB-GENE-040724-152]
ENSDART00000082256	1.46204	0.0018182	yes	cytosolic iron-sulfur protein assembly 1 homolog (S. cerevisiae) [Source:ZFIN;Acc:ZDB-GENE-040426-839]
ENSDART00000140897	1.45774	0.0021093	yes	La ribonucleoprotein domain family, member 6 [Source:ZFIN;Acc:ZDB-GENE-030131-6403]
ENSDART00000128936	1.45529	0.00072121	yes	mitochondrial ribosomal protein S15 [Source:ZFIN;Acc:ZDB-GENE-040718-188]
ENSDART00000024137	1.45298	3.1823e-06	yes	procollagen-proline, 2-oxoglutarate 4-dioxygenase (proline 4-hydroxylase), alpha polypeptide 2 [Source:ZFIN;Acc:ZDB-GENE-030827-1]
ENSDART00000104487	1.45066	0.0010637	yes	cytochrome c oxidase subunit IV isoform 2 [Source:ZFIN;Acc:ZDB-GENE-040426-1775]
ENSDART00000029579	1.44482	0.00036712	yes	coiled-coil domain containing 12 [Source:ZFIN;Acc:ZDB-GENE-040801-108]
ENSDART00000139411	1.44318	0.0026718	yes	phosphatidic acid phosphatase type 2C [Source:ZFIN;Acc:ZDB-GENE-030131-7425]
ENSDART00000131027	1.43651	0.0045875	yes	Transmembrane protein 216 [Source:UniProtKB/Swiss-Prot;Acc:E7EYQ9]
ENSDART00000024576	1.43542	1.7338e-05	yes	FK506 binding protein 4 [Source:ZFIN;Acc:ZDB-GENE-030131-514]
ENSDART00000114610	1.43117	0.0031189	yes	inner centromere protein antigens 135/155kDa [Source:HGNC Symbol;Acc:HGNC:6058]
ENSDART00000086823	1.42674	1.8616e-05	yes	signal recognition particle receptor (docking protein) [Source:ZFIN;Acc:ZDB-GENE-030219-11]
ENSDART00000123243	1.42029	0.00067318	yes	translocase of inner mitochondrial membrane 22 homolog (yeast) [Source:HGNC Symbol;Acc:HGNC:17317]
ENSDART00000040065	1.41907	0.0093004	yes	cancer susceptibility candidate 3 [Source:ZFIN;Acc:ZDB-GENE-040308-2]
ENSDART00000097273	1.41738	0.0018183	yes	RNA binding motif protein 6 [Source:ZFIN;Acc:ZDB-GENE-050309-79]
ENSDART00000085282	1.41262	0.0026719	yes	mitochondrial ribosomal protein L32 [Source:ZFIN;Acc:ZDB-GENE-060825-188]
ENSDART00000017962	1.40633	0.0019447	yes	enoyl-CoA delta isomerase 1 [Source:ZFIN;Acc:ZDB-GENE-030131-6033]
ENSDART00000099528	1.40347	0.0039059	yes	sprouty (Drosophila) homolog 4 [Source:ZFIN;Acc:ZDB-GENE-010803-2]
ENSDART00000122064	1.40332	0.0093005	yes	angiopoietin-like 2 [Source:HGNC Symbol;Acc:HGNC:490]
ENSDART00000067599	1.40288	0.00039733	yes	angiopoietin-like 2a [Source:ZFIN;Acc:ZDB-GENE-080721-15]
ENSDART00000050902	1.39737	0.0093004	yes	polymerase (RNA) II (DNA directed) polypeptide J [Source:ZFIN;Acc:ZDB-GENE-050522-120]
ENSDART00000136320	1.39528	0.0067095	yes	ring finger protein 141 [Source:ZFIN;Acc:ZDB-GENE-040625-71]
ENSDART00000100160	1.39322	8.2089e-06	yes	CTF8, chromosome transmission fidelity factor 8 homolog (S. cerevisiae) [Source:ZFIN;Acc:ZDB-GENE-050419-148]
ENSDART00000067488	1.39097	0.0022821	yes	mitochondrial ribosomal protein S10 [Source:ZFIN;Acc:ZDB-GENE-040914-39]
ENSDART00000145989	1.3873	0.0045875	yes	exocyst complex component 1 [Source:ZFIN;Acc:ZDB-GENE-030131-1057]
ENSDART00000141742	1.38179	0.0067096	yes	periphilin 1 [Source:ZFIN;Acc:ZDB-GENE-030131-1873]
ENSDART00000154645	1.38102	0.0045875	yes	ring finger protein 2 [Source:ZFIN;Acc:ZDB-GENE-030131-5243]
ENSDART00000122278	1.3801	0.0026719	yes	Uncharacterized protein [Source:UniProtKB/TrEMBL;Acc:H9GYL7]
ENSDART00000155580	1.37724	0.00041839	yes	chromosome 15 open reading frame 57 [Source:HGNC Symbol;Acc:HGNC:28295]
ENSDART00000090413	1.37452	4.484e-05	yes	small nuclear RNA activating complex, polypeptide 5 [Source:ZFIN;Acc:ZDB-GENE-041111-50]
ENSDART00000106672	1.37227	0.00029096	yes	ADP-ribosylation factor-like 9 [Source:ZFIN;Acc:ZDB-GENE-060825-210]
ENSDART00000063839	1.37196	0.0045875	yes	si:ch211-22i13.2 [Source:ZFIN;Acc:ZDB-GENE-041014-143]
ENSDART00000149868	1.36847	0.0026719	yes	G-rich RNA sequence binding factor 1 [Source:ZFIN;Acc:ZDB-GENE-060825-196]
ENSDART00000088928	1.36671	0.0045875	yes	family with sequence similarity 168, member B [Source:ZFIN;Acc:ZDB-GENE-060929-180]
ENSDART00000010211	1.3615	0.0028136	yes	poly(A) binding protein interacting protein 2B [Source:ZFIN;Acc:ZDB-GENE-040426-1736]
ENSDART00000021240	1.35975	0.00041839	yes	nucleophosmin 1a [Source:ZFIN;Acc:ZDB-GENE-021028-1]
ENSDART00000144404	1.35275	0.0093005	yes	interleukin enhancer binding factor 3b [Source:ZFIN;Acc:ZDB-GENE-030131-587]
ENSDART00000029121	1.34993	0.0013376	yes	ubiquitin specific protease 5 [Source:ZFIN;Acc:ZDB-GENE-040426-2584]
ENSDART00000060098	1.34298	1.4342e-05	yes	gem (nuclear organelle) associated protein 7 [Source:HGNC Symbol;Acc:HGNC:20045]
ENSDART00000090930	1.3418	0.0047983	yes	Na+/K+ transporting ATPase interacting 4 [Source:ZFIN;Acc:ZDB-GENE-080204-60]
ENSDART00000112784	1.34131	0.0097539	yes	LYR motif containing 9 [Source:ZFIN;Acc:ZDB-GENE-081022-28]
ENSDART00000021336	1.33824	0.00030276	yes	DnaJ (Hsp40) homolog, subfamily A, member 1 [Source:ZFIN;Acc:ZDB-GENE-030131-2642]
ENSDART00000153449	1.33684	0.0093006	yes	N-acetyltransferase 9 (GCN5-related, putative) [Source:ZFIN;Acc:ZDB-GENE-030131-5097]
ENSDART00000015076	1.33176	0.0023825	yes	chromosome 9 open reading frame 78 [Source:HGNC Symbol;Acc:HGNC:24932]
ENSDART00000144303	1.33151	0.00050845	yes	zgc:86811 [Source:ZFIN;Acc:ZDB-GENE-040625-113]
ENSDART00000066269	1.3266	0.00010762	yes	ADP-ribosylation factor-like 4D [Source:ZFIN;Acc:ZDB-GENE-030131-2293]
ENSDART00000057612	1.32326	0.0082074	yes	regulator of G-protein signaling 17 [Source:ZFIN;Acc:ZDB-GENE-040718-229]
ENSDART00000153210	1.32214	0.00097464	yes	serine/arginine-rich splicing factor 2a [Source:ZFIN;Acc:ZDB-GENE-040426-2706]
ENSDART00000000005	1.32008	0.0082074	yes	coiled-coil domain containing 80 [Source:ZFIN;Acc:ZDB-GENE-030616-56]
ENSDART00000052396	1.31952	0.0020152	yes	ACN9 homolog (S. cerevisiae) [Source:ZFIN;Acc:ZDB-GENE-041010-94]
ENSDART00000146352	1.31685	0.0019448	yes	myeloid ecotropic viral integration site 4.1a [Source:ZFIN;Acc:ZDB-GENE-020122-3]
ENSDART00000021406	1.31609	6.6482e-05	yes	peptidylprolyl isomerase (cyclophilin)-like 1 [Source:ZFIN;Acc:ZDB-GENE-051009-1]
ENSDART00000101841	1.31559	2.7564e-07	yes	dynein, light chain, LC8-type 1 [Source:ZFIN;Acc:ZDB-GENE-040426-1961]
ENSDART00000127628	1.31515	0.0093006	yes	ERBB receptor feedback inhibitor 1 [Source:HGNC Symbol;Acc:HGNC:18185]
ENSDART00000139634	1.31263	0.0033181	yes	dipeptidylpeptidase 3 [Source:ZFIN;Acc:ZDB-GENE-030131-1247]
ENSDART00000082481	1.31093	0.00082982	yes	DnaJ (Hsp40) homolog, subfamily C, member 8 [Source:ZFIN;Acc:ZDB-GENE-030131-66]
ENSDART00000104180	1.2939	0.0019448	yes	zinc finger, RAN-binding domain containing 2 [Source:ZFIN;Acc:ZDB-GENE-040426-2743]
ENSDART00000104063	1.29294	6.6482e-05	yes	proteasome (prosome, macropain) 26S subunit, non-ATPase, 4a [Source:ZFIN;Acc:ZDB-GENE-040625-104]
ENSDART00000018677	1.2892	9.4199e-05	yes	COP9 signalosome subunit 6 [Source:HGNC Symbol;Acc:HGNC:21749]
ENSDART00000040753	1.28845	0.0028769	yes	nudix (nucleoside diphosphate linked moiety X)-type motif 1 [Source:ZFIN;Acc:ZDB-GENE-040426-2757]
ENSDART00000140111	1.28536	9.1046e-06	yes	cathepsin H [Source:ZFIN;Acc:ZDB-GENE-030131-3539]
ENSDART00000002583	1.28139	0.0023826	yes	alanyl-tRNA synthetase domain containing 1 [Source:ZFIN;Acc:ZDB-GENE-040801-91]
ENSDART00000101462	1.27714	3.3829e-06	yes	mitochondrial ribosomal protein S18C [Source:ZFIN;Acc:ZDB-GENE-060503-609]
ENSDART00000149798	1.27375	0.0028137	yes	dynein, cytoplasmic 1, intermediate chain 2a [Source:ZFIN;Acc:ZDB-GENE-060929-1086]
ENSDART00000016024	1.27207	0.0057963	yes	tnf receptor-associated factor 4a [Source:ZFIN;Acc:ZDB-GENE-040308-1]
ENSDART00000084119	1.26155	0.0056786	yes	chromosome 5 open reading frame 24 [Source:HGNC Symbol;Acc:HGNC:26746]
ENSDART00000023814	1.26091	0.00013303	yes	protein kinase C substrate 80K-H [Source:ZFIN;Acc:ZDB-GENE-040426-770]
ENSDART00000143642	1.25834	1.2795e-05	yes	late endosomal/lysosomal adaptor, MAPK and MTOR activator 4 [Source:HGNC Symbol;Acc:HGNC:33772]
ENSDART00000099552	1.25798	0.0057963	yes	exosome component 8 [Source:ZFIN;Acc:ZDB-GENE-030131-1736]
ENSDART00000113093	1.25509	0.00022141	yes	glucosidase, beta, acid [Source:ZFIN;Acc:ZDB-GENE-100922-270]
ENSDART00000087242	1.25186	0.0023826	yes	ATPase inhibitory factor 1a [Source:ZFIN;Acc:ZDB-GENE-070410-36]
ENSDART00000064113	1.25116	0.0082075	yes	activator of basal transcription 1 [Source:ZFIN;Acc:ZDB-GENE-050522-127]
ENSDART00000004075	1.25068	1.1618e-11	yes	ubiquinol-cytochrome c reductase complex assembly factor 2 [Source:HGNC Symbol;Acc:HGNC:21237]
ENSDART00000141946	1.24955	0.0068997	yes	pyrophosphatase (inorganic) 1b [Source:ZFIN;Acc:ZDB-GENE-050417-375]
ENSDART00000076287	1.24872	0.00050848	yes	lysosomal-associated membrane protein 1 [Source:HGNC Symbol;Acc:HGNC:6499]
ENSDART00000036783	1.24504	0.0057963	yes	crystallin, zeta (quinone reductase)-like 1 [Source:ZFIN;Acc:ZDB-GENE-040718-378]
ENSDART00000016608	1.23878	0.0040496	yes	mitochondrial ribosomal protein 63 [Source:ZFIN;Acc:ZDB-GENE-040426-1745]
ENSDART00000077938	1.23859	0.0068995	yes	core 1 synthase, glycoprotein-N-acetylgalactosamine 3-beta-galactosyltransferase, 1b [Source:ZFIN;Acc:ZDB-GENE-030131-9075]
ENSDART00000057638	1.23364	0.00085472	yes	hexokinase 1 [Source:ZFIN;Acc:ZDB-GENE-040426-2848]
ENSDART00000057527	1.23259	0.0057964	yes	zgc:113019 [Source:ZFIN;Acc:ZDB-GENE-050417-449]
ENSDART00000112793	1.22872	0.0034145	yes	cell division cycle 26 homolog [Source:ZFIN;Acc:ZDB-GENE-040822-18]
ENSDART00000140987	1.22804	0.0082075	yes	phosphate cytidylyltransferase 2, ethanolamine [Source:ZFIN;Acc:ZDB-GENE-041010-132]
ENSDART00000151537	1.22625	0.006899	yes	proteasome (prosome, macropain) 216S subunit, non-ATPase, 11a [Source:ZFIN;Acc:ZDB-GENE-030131-2711]
ENSDART00000103357	1.21789	0.00043644	yes	vesicle-associated membrane protein, associated protein B and C [Source:ZFIN;Acc:ZDB-GENE-030131-2348]
ENSDART00000053285	1.21577	0.001024	yes	NADH dehydrogenase (ubiquinone) 1 alpha subcomplex, 7 [Source:ZFIN;Acc:ZDB-GENE-040801-169]
ENSDART00000048843	1.21536	1.0909e-05	yes	suppressor of Ty 4 homolog 1 (S. cerevisiae) [Source:ZFIN;Acc:ZDB-GENE-040718-214]
ENSDART00000026578	1.21148	0.0020393	yes	ubiquitin-conjugating enzyme E2 variant 2 [Source:ZFIN;Acc:ZDB-GENE-040426-2919]
ENSDART00000051055	1.19998	1.8203e-09	yes	NADH dehydrogenase (ubiquinone) Fe-S protein 4, (NADH-coenzyme Q reductase) [Source:ZFIN;Acc:ZDB-GENE-050522-421]
ENSDART00000103704	1.19414	3.397e-06	yes	nucleosome assembly protein 1-like 4a [Source:ZFIN;Acc:ZDB-GENE-030131-9099]
ENSDART00000127925	1.19184	0.0098613	yes	Uncharacterized protein [Source:UniProtKB/TrEMBL;Acc:E7EZV8]
ENSDART00000130626	1.19064	0.0098611	yes	arginyl-tRNA synthetase [Source:ZFIN;Acc:ZDB-GENE-030131-9014]
ENSDART00000099463	1.1879	0.0097211	yes	LysM, putative peptidoglycan-binding, domain containing 4 [Source:ZFIN;Acc:ZDB-GENE-040426-1895]
ENSDART00000049900	1.18596	1.26e-06	yes	transgelin 2 [Source:ZFIN;Acc:ZDB-GENE-020802-2]
ENSDART00000016112	1.18172	9.46e-05	yes	calpain, small subunit 1 b [Source:ZFIN;Acc:ZDB-GENE-030131-5206]
ENSDART00000014088	1.18043	0.005771	yes	cytidylate kinase [Source:ZFIN;Acc:ZDB-GENE-040426-2113]
ENSDART00000097217	1.17706	0.0028301	yes	family with sequence similarity 109, member B [Source:HGNC Symbol;Acc:HGNC:27161]
ENSDART00000043933	1.17568	0.00011218	yes	NADH dehydrogenase (ubiquinone) 1 beta subcomplex, 7 [Source:ZFIN;Acc:ZDB-GENE-040426-1886]
ENSDART00000109665	1.17516	0.0011975	yes	protein phosphatase 1G (formerly 2C), magnesium-dependent, gamma isoform [Source:ZFIN;Acc:ZDB-GENE-030425-4]
ENSDART00000013870	1.17211	0.00043557	yes	ubiquitin-like 4A [Source:HGNC Symbol;Acc:HGNC:12505]
ENSDART00000113367	1.16226	0.0024147	yes	aurora kinase A interacting protein 1 [Source:ZFIN;Acc:ZDB-GENE-070928-24]
ENSDART00000150842	1.16135	0.0011975	yes	up-regulated during skeletal muscle growth 5 homolog (mouse) [Source:HGNC Symbol;Acc:HGNC:30889]
ENSDART00000149922	1.16134	0.0081048	yes	palladin, cytoskeletal associated protein [Source:ZFIN;Acc:ZDB-GENE-041014-252]
ENSDART00000102363	1.15827	0.004828	yes	reticulocalbin 1, EF-hand calcium binding domain [Source:ZFIN;Acc:ZDB-GENE-080225-33]
ENSDART00000100569	1.15709	0.0014269	yes	SMAD family member 6b [Source:ZFIN;Acc:ZDB-GENE-050419-198]
ENSDART00000022358	1.15394	0.0017003	yes	zinc finger CCCH-type containing 15 [Source:ZFIN;Acc:ZDB-GENE-030131-6239]
ENSDART00000002714	1.14436	0.0028301	yes	solute carrier family 17, member 9b [Source:ZFIN;Acc:ZDB-GENE-040718-380]
ENSDART00000142463	1.14428	0.0011975	yes	thioredoxin-like 4A [Source:ZFIN;Acc:ZDB-GENE-041010-25]
ENSDART00000110429	1.13965	0.0010051	yes	zgc:194285 [Source:ZFIN;Acc:ZDB-GENE-081022-97]
ENSDART00000151736	1.13636	0.00060744	yes	leucine-rich repeats and calponin homology (CH) domain containing 3 [Source:HGNC Symbol;Acc:HGNC:28637]
ENSDART00000130083	1.13522	0.003381	yes	LSM8 homolog, U6 small nuclear RNA associated [Source:ZFIN;Acc:ZDB-GENE-070629-3]
ENSDART00000148138	1.13516	0.0016623	yes	leucine rich repeat containing 8 family, member A [Source:ZFIN;Acc:ZDB-GENE-030131-5853]
ENSDART00000066722	1.13447	0.0097211	yes	poly(A) binding protein, nuclear 1 [Source:ZFIN;Acc:ZDB-GENE-040426-2401]
ENSDART00000148119	1.13147	0.0097211	yes	im:7148292 [Source:ZFIN;Acc:ZDB-GENE-050506-149]
ENSDART00000102062	1.12339	4.3315e-07	yes	tissue inhibitor of metalloproteinase 2b [Source:ZFIN;Acc:ZDB-GENE-040426-2655]
ENSDART00000074768	1.12237	8.689e-06	yes	peptidylprolyl isomerase Fb [Source:ZFIN;Acc:ZDB-GENE-051030-126]
ENSDART00000077951	1.12237	2.3556e-05	yes	procollagen C-endopeptidase enhancer 2b [Source:ZFIN;Acc:ZDB-GENE-040426-1177]
ENSDART00000155712	1.12158	0.0023696	yes	EBNA1 binding protein 2 [Source:ZFIN;Acc:ZDB-GENE-030131-6989]
ENSDART00000018972	1.12145	0.00010765	yes	chromosome 16 open reading frame 87 [Source:HGNC Symbol;Acc:HGNC:33754]
ENSDART00000002465	1.12132	0.00057698	yes	mutS homolog 2 (E. coli) [Source:ZFIN;Acc:ZDB-GENE-040426-2932]
ENSDART00000066257	1.11294	0.0097212	yes	ectonucleoside triphosphate diphosphohydrolase 1 [Source:ZFIN;Acc:ZDB-GENE-040801-58]
ENSDART00000143364	1.11165	0.00059477	yes	stromal cell-derived factor 2-like 1 [Source:ZFIN;Acc:ZDB-GENE-040808-46]
ENSDART00000002763	1.10703	1.1273e-08	yes	calponin 3, acidic a [Source:ZFIN;Acc:ZDB-GENE-030131-5130]
ENSDART00000130352	1.10665	0.0056415	yes	tissue factor pathway inhibitor a [Source:ZFIN;Acc:ZDB-GENE-030711-1]
ENSDART00000098197	1.10484	0.0065254	yes	multiple EGF-like-domains 9 [Source:HGNC Symbol;Acc:HGNC:3234]
ENSDART00000133039	1.10366	4.9787e-07	yes	tachykinin 3a [Source:ZFIN;Acc:ZDB-GENE-090313-253]
ENSDART00000135318	1.10135	4.1547e-18	yes	actin, beta 1 [Source:ZFIN;Acc:ZDB-GENE-000329-1]
ENSDART00000129714	1.09828	2.6751e-13	yes	signal peptidase complex subunit 3 homolog (S. cerevisiae) [Source:ZFIN;Acc:ZDB-GENE-040426-2206]
ENSDART00000127177	1.09682	0.0097212	yes	mitochondrial ribosomal protein L52 [Source:HGNC Symbol;Acc:HGNC:16655]
ENSDART00000122718	1.09558	0.0054387	yes	solute carrier family 25 (mitochondrial carrier, Aralar), member 12 [Source:ZFIN;Acc:ZDB-GENE-031006-11]
ENSDART00000130696	1.09313	0.00014762	yes	myeloma overexpressed 2 [Source:ZFIN;Acc:ZDB-GENE-040426-1883]
ENSDART00000098673	1.09184	1.1482e-05	yes	pentraxin 3, long a [Source:ZFIN;Acc:ZDB-GENE-030131-8720]
ENSDART00000135831	1.08781	0.0027472	yes	lamin A [Source:ZFIN;Acc:ZDB-GENE-020424-3]
ENSDART00000059619	1.08708	0.0056416	yes	FK506 binding protein 14 [Source:ZFIN;Acc:ZDB-GENE-040801-210]
ENSDART00000017191	1.0843	0.0039336	yes	distal-less homeobox gene 3b [Source:ZFIN;Acc:ZDB-GENE-980526-280]
ENSDART00000145778	1.08101	0.0032866	yes	eukaryotic translation initiation factor 4 gamma, 1 [Source:HGNC Symbol;Acc:HGNC:3296]
ENSDART00000104791	1.08009	0.00034091	yes	zgc:153722 [Source:ZFIN;Acc:ZDB-GENE-060929-84]
ENSDART00000078266	1.07996	1.9223e-05	yes	ribosomal L1 domain containing 1 [Source:HGNC Symbol;Acc:HGNC:24534]
ENSDART00000143518	1.07915	0.00066255	yes	GTPase activating protein (SH3 domain) binding protein 1 [Source:ZFIN;Acc:ZDB-GENE-030131-7452]
ENSDART00000063028	1.07874	0.0067606	yes	connective tissue growth factor a [Source:ZFIN;Acc:ZDB-GENE-030131-102]
ENSDART00000147097	1.07855	0.0026387	yes	ubiquitin-conjugating enzyme E2A (RAD6 homolog) [Source:ZFIN;Acc:ZDB-GENE-030616-72]
ENSDART00000138351	1.07706	0.0010791	yes	cystathionase (cystathionine gamma-lyase) [Source:ZFIN;Acc:ZDB-GENE-030131-774]
ENSDART00000018469	1.07429	2.2012e-05	yes	nephronectin [Source:ZFIN;Acc:ZDB-GENE-090312-201]
ENSDART00000058546	1.07025	0.0016078	yes	estrogen receptor binding site associated, antigen, 9 [Source:ZFIN;Acc:ZDB-GENE-040426-1093]
ENSDART00000062858	1.0689	1.8528e-05	yes	2-aminoethanethiol (cysteamine) dioxygenase a [Source:ZFIN;Acc:ZDB-GENE-041212-62]
ENSDART00000091351	1.06786	0.0074793	yes	glycerol kinase 5 (putative) [Source:ZFIN;Acc:ZDB-GENE-061110-49]
ENSDART00000049147	1.06695	0.0089905	yes	RNA binding motif protein 48 [Source:ZFIN;Acc:ZDB-GENE-060328-1]
ENSDART00000130343	1.0658	0.0022971	yes	poly (ADP-ribose) polymerase family, member 12a [Source:ZFIN;Acc:ZDB-GENE-050419-6]
ENSDART00000138835	1.05625	0.00079064	yes	si:ch211-156j16.1 [Source:ZFIN;Acc:ZDB-GENE-030131-4106]
ENSDART00000125264	1.05248	0.0089905	yes	golgi membrane protein 1 [Source:HGNC Symbol;Acc:HGNC:15451]
ENSDART00000122099	1.0512	2.7887e-15	yes	dynein, light chain, LC8-type 2a [Source:ZFIN;Acc:ZDB-GENE-030828-11]
ENSDART00000146625	1.0511	2.5114e-05	yes	nuclear factor of kappa light polypeptide gene enhancer in B-cells inhibitor, alpha a [Source:ZFIN;Acc:ZDB-GENE-040426-2227]
ENSDART00000023101	1.04936	0.0025131	yes	pescadillo [Source:ZFIN;Acc:ZDB-GENE-990415-206]
ENSDART00000027171	1.04868	7.6658e-11	yes	coagulation factor IIIb [Source:ZFIN;Acc:ZDB-GENE-050417-234]
ENSDART00000064111	1.04678	0.0051874	yes	Finkel-Biskis-Reilly murine sarcoma virus (FBR-MuSV) ubiquitously expressed b [Source:ZFIN;Acc:ZDB-GENE-050417-416]
ENSDART00000043002	1.04389	5.7143e-05	yes	RAB1A, member RAS oncogene family [Source:ZFIN;Acc:ZDB-GENE-030616-564]
ENSDART00000121420	1.03873	0.00090339	yes	SEC14-like 1 (S. cerevisiae) [Source:HGNC Symbol;Acc:HGNC:10698]
ENSDART00000142674	1.03715	3.3953e-05	yes	zinc finger protein 36, C3H type-like 2 [Source:ZFIN;Acc:ZDB-GENE-030131-5873]
ENSDART00000011691	1.0335	0.0051873	yes	bcl2-associated X protein, a [Source:ZFIN;Acc:ZDB-GENE-000511-6]
ENSDART00000061672	1.03212	0.00044511	yes	PRP39 pre-mRNA processing factor 39 homolog (yeast) [Source:ZFIN;Acc:ZDB-GENE-030616-420]
ENSDART00000006942	1.03197	0.0074793	yes	thioredoxin domain containing 15 [Source:HGNC Symbol;Acc:HGNC:20652]
ENSDART00000029586	1.02978	3.0924e-14	yes	DnaJ (Hsp40) homolog, subfamily A, member 2 [Source:ZFIN;Acc:ZDB-GENE-040426-2884]
ENSDART00000133920	1.02911	0.0022049	yes	chromosome 6 open reading frame 52 [Source:HGNC Symbol;Acc:HGNC:20881]
ENSDART00000126470	1.02794	0.0026388	yes	zgc:85777 [Source:ZFIN;Acc:ZDB-GENE-040426-2210]
ENSDART00000153369	1.01564	0.0074794	yes	COX11 cytochrome c oxidase assembly homolog (yeast) [Source:ZFIN;Acc:ZDB-GENE-050506-82]
ENSDART00000109694	1.01324	0.0034111	yes	carbonic anhydrase V [Source:ZFIN;Acc:ZDB-GENE-080220-57]
ENSDART00000023074	1.01232	6.1564e-05	yes	mitochondrial ribosomal protein S18B [Source:ZFIN;Acc:ZDB-GENE-050417-278]
ENSDART00000041700	1.01193	0.0028467	yes	peroxiredoxin 3 [Source:ZFIN;Acc:ZDB-GENE-030826-18]
ENSDART00000022967	1.01067	0.0025132	yes	amidohydrolase domain containing 2 [Source:ZFIN;Acc:ZDB-GENE-040426-1871]
ENSDART00000141068	1.01037	0.0049057	yes	SRY-box containing gene 11b [Source:ZFIN;Acc:ZDB-GENE-980526-466]
ENSDART00000100422	1.01024	0.0058885	yes	Ras-like without CAAX 1 [Source:ZFIN;Acc:ZDB-GENE-070912-329]
ENSDART00000080413	1.00324	3.3287e-10	yes	serine/arginine-rich splicing factor 1a [Source:ZFIN;Acc:ZDB-GENE-040426-1950]
ENSDART00000091901	1.00311	1.2232e-05	yes	proteasome (prosome, macropain) 26S subunit, non-ATPase, 14 [Source:ZFIN;Acc:ZDB-GENE-070410-56]
ENSDART00000077063	1.00238	0.0016596	yes	SEC13 homolog (S. cerevisiae) [Source:ZFIN;Acc:ZDB-GENE-040426-2649]
ENSDART00000054689	1.00071	0.0079768	yes	atonal homolog 8 [Source:ZFIN;Acc:ZDB-GENE-061215-7]
372 down-regulated genes
Accession	log2fold_change	p-value	significant	annotation
ENSDART00000005217	-1.02178	1.897e-06	yes	aminolevulinate, delta-, synthetase 1 [Source:ZFIN;Acc:ZDB-GENE-001229-2]
ENSDART00000005879	-1.02391	0.0059973	yes	ATP synthase, H+ transporting, mitochondrial F1 complex, O subunit [Source:ZFIN;Acc:ZDB-GENE-050522-147]
ENSDART00000126101	-1.02685	6.3695e-05	yes	scavenger receptor class B, member 2 [Source:ZFIN;Acc:ZDB-GENE-020419-29]
ENSDART00000144632	-1.03012	4.2905e-05	yes	FK506 binding protein 3 [Source:ZFIN;Acc:ZDB-GENE-030616-419]
ENSDART00000023278	-1.03577	2.232e-05	yes	fatty acid desaturase 2 [Source:ZFIN;Acc:ZDB-GENE-011212-1]
ENSDART00000099105	-1.0375	1.4069e-15	yes	ubiquitin C [Source:ZFIN;Acc:ZDB-GENE-061110-88]
ENSDART00000149553	-1.03905	0.0015654	yes	3-hydroxy-3-methylglutaryl-Coenzyme A reductase a [Source:ZFIN;Acc:ZDB-GENE-040401-2]
ENSDART00000152702	-1.04737	0.0028611	yes	jun proto-oncogene [Source:ZFIN;Acc:ZDB-GENE-030131-7859]
ENSDART00000127955	-1.05113	0.00048671	yes	LysM, putative peptidoglycan-binding, domain containing 2 [Source:ZFIN;Acc:ZDB-GENE-040801-250]
ENSDART00000105168	-1.05636	0.0015653	yes	endonuclease domain containing 1 [Source:HGNC Symbol;Acc:HGNC:29129]
ENSDART00000065600	-1.05685	0.0047312	yes	sterol-C5-desaturase [Source:ZFIN;Acc:ZDB-GENE-040912-56]
ENSDART00000156699	-1.06544	0.0011465	yes	ribosomal L24 domain containing 1 [Source:ZFIN;Acc:ZDB-GENE-040426-1925]
ENSDART00000058695	-1.06573	0.00095596	yes	histidine triad nucleotide binding protein 1 [Source:ZFIN;Acc:ZDB-GENE-040927-8]
ENSDART00000145449	-1.07318	0.001002	yes	ribosomal protein L10 [Source:ZFIN;Acc:ZDB-GENE-030131-8656]
ENSDART00000144114	-1.07376	5.5328e-06	yes	diazepam binding inhibitor (GABA receptor modulator, acyl-CoA binding protein) [Source:ZFIN;Acc:ZDB-GENE-040426-1861]
ENSDART00000113272	-1.07428	8.1012e-07	yes	Uncharacterized protein [Source:UniProtKB/TrEMBL;Acc:E7FAV2]
ENSDART00000008593	-1.09544	0.00060737	yes	Yip1 domain family, member 5 [Source:ZFIN;Acc:ZDB-GENE-040426-1057]
ENSDART00000143480	-1.09833	0.0051861	yes	human immunodeficiency virus type I enhancer binding protein 3a [Source:ZFIN;Acc:ZDB-GENE-081029-2]
ENSDART00000154389	-1.10227	3.1475e-11	yes	histone cluster 1, H4k [Source:HGNC Symbol;Acc:HGNC:4784]
ENSDART00000141096	-1.10826	0.0017276	yes	angiomotin [Source:ZFIN;Acc:ZDB-GENE-030131-7487]
ENSDART00000100778	-1.10969	0.0075062	yes	C15orf38-AP3S2 readthrough [Source:HGNC Symbol;Acc:HGNC:38824]
ENSDART00000143917	-1.11548	0.0044395	yes	lipase, endothelial [Source:ZFIN;Acc:ZDB-GENE-040426-699]
ENSDART00000000744	-1.1167	0.00072691	yes	synaptophysin-like 2b [Source:ZFIN;Acc:ZDB-GENE-050417-309]
ENSDART00000063662	-1.11799	2.8388e-11	yes	malate dehydrogenase 2, NAD (mitochondrial) [Source:ZFIN;Acc:ZDB-GENE-040426-2143]
ENSDART00000053125	-1.12328	1.2221e-07	yes	sema domain, immunoglobulin domain (Ig), short basic domain, secreted, (semaphorin) 3E [Source:ZFIN;Acc:ZDB-GENE-030131-7864]
ENSDART00000140586	-1.12558	0.0090368	yes	collagen, type I, alpha 1a [Source:ZFIN;Acc:ZDB-GENE-030131-9102]
ENSDART00000102863	-1.12569	6.6219e-13	yes	zgc:158463 [Source:ZFIN;Acc:ZDB-GENE-070410-9]
ENSDART00000124868	-1.13415	0.00010974	yes	lipoprotein lipase [Source:ZFIN;Acc:ZDB-GENE-990415-139]
ENSDART00000055099	-1.13501	0.00013092	yes	UDP-Gal:betaGlcNAc beta 1,4- galactosyltransferase, polypeptide 5 [Source:ZFIN;Acc:ZDB-GENE-060628-3]
ENSDART00000001253	-1.15679	1.4214e-09	yes	si:busm1-57f23.1 [Source:ZFIN;Acc:ZDB-GENE-030616-512]
ENSDART00000011332	-1.15755	0.009204	yes	zinc finger, MYND domain containing 19 [Source:ZFIN;Acc:ZDB-GENE-030131-4460]
ENSDART00000145270	-1.15957	0.0025736	yes	chromosome 19 open reading frame 53 [Source:HGNC Symbol;Acc:HGNC:24991]
ENSDART00000052240	-1.16151	0.002627	yes	proteasome (prosome, macropain) assembly chaperone 2 [Source:ZFIN;Acc:ZDB-GENE-040426-1972]
ENSDART00000126646	-1.16166	0.0030858	yes	mitochondrial assembly of ribosomal large subunit 1 [Source:HGNC Symbol;Acc:HGNC:21721]
ENSDART00000050070	-1.16874	0.00075058	yes	phosphatidylinositol glycan, class F [Source:ZFIN;Acc:ZDB-GENE-040426-1801]
ENSDART00000104519	-1.17264	0.0031421	yes	signal transduction and activation of transcription 3 [Source:ZFIN;Acc:ZDB-GENE-980526-68]
ENSDART00000039827	-1.17818	0.0044933	yes	protein phosphatase 1, regulatory (inhibitor) subunit 14Bb [Source:ZFIN;Acc:ZDB-GENE-030616-595]
ENSDART00000156703	-1.18009	0.0013037	yes	si:ch211-286b4.3 [Source:ZFIN;Acc:ZDB-GENE-131127-589]
ENSDART00000144019	-1.18186	0.00045117	yes	homeo box A3a [Source:ZFIN;Acc:ZDB-GENE-000823-3]
ENSDART00000146933	-1.19764	2.9003e-10	yes	complement component 7a [Source:ZFIN;Acc:ZDB-GENE-081104-392]
ENSDART00000144671	-1.19937	0.0026368	yes	proteasome (prosome, macropain) assembly chaperone 1 [Source:ZFIN;Acc:ZDB-GENE-040718-469]
ENSDART00000146024	-1.20416	0.0037579	yes	Sec61 gamma subunit [Source:ZFIN;Acc:ZDB-GENE-040718-203]
ENSDART00000016607	-1.21212	0.0064175	yes	regulator of G-protein signaling 5b [Source:ZFIN;Acc:ZDB-GENE-050417-359]
ENSDART00000111724	-1.22574	1.0163e-06	yes	si:dkey-261m9.9 [Source:ZFIN;Acc:ZDB-GENE-030131-5087]
ENSDART00000017402	-1.23003	3.8953e-06	yes	inositol hexakisphosphate kinase 2 [Source:HGNC Symbol;Acc:HGNC:17313]
ENSDART00000088484	-1.23086	4.0268e-11	yes	AHNAK nucleoprotein [Source:ZFIN;Acc:ZDB-GENE-030131-8719]
ENSDART00000127411	-1.23137	6.955e-05	yes	Uncharacterized protein [Source:UniProtKB/TrEMBL;Acc:E7EXW4]
ENSDART00000102210	-1.24006	0.00064842	yes	integrin, alpha 6b [Source:ZFIN;Acc:ZDB-GENE-050320-5]
ENSDART00000082124	-1.24423	0.0044476	yes	pim-1 oncogene [Source:ZFIN;Acc:ZDB-GENE-061013-139]
ENSDART00000123459	-1.24625	1.9546e-23	yes	Uncharacterized protein [Source:UniProtKB/TrEMBL;Acc:F1R7C8]
ENSDART00000125433	-1.24768	1.4068e-23	yes	Uncharacterized protein [Source:UniProtKB/TrEMBL;Acc:F1QLL6]
ENSDART00000115090	-1.25165	0.0022122	yes	glutamic pyruvate transaminase (alanine aminotransferase) 2 [Source:ZFIN;Acc:ZDB-GENE-030729-8]
ENSDART00000009012	-1.25291	1.842e-08	yes	Uncharacterized protein [Source:UniProtKB/TrEMBL;Acc:A5WV53]
ENSDART00000149099	-1.25714	0.0052833	yes	eph receptor A2 a [Source:ZFIN;Acc:ZDB-GENE-990415-63]
ENSDART00000050332	-1.26312	0.00032396	yes	guanine nucleotide binding protein (G protein) alpha 12a [Source:ZFIN;Acc:ZDB-GENE-050221-1]
ENSDART00000037224	-1.27243	1.0573e-05	yes	zgc:56530 [Source:ZFIN;Acc:ZDB-GENE-040426-1065]
ENSDART00000065923	-1.28626	0.0053709	yes	ribosomal RNA processing 7 homolog A (S. cerevisiae) [Source:ZFIN;Acc:ZDB-GENE-050417-38]
ENSDART00000102260	-1.28986	0.0091409	yes	si:dkey-222f8.3 [Source:ZFIN;Acc:ZDB-GENE-030131-3658]
ENSDART00000037904	-1.2918	4.0306e-09	yes	suppressor of cytokine signaling 3b [Source:ZFIN;Acc:ZDB-GENE-040426-2528]
ENSDART00000141287	-1.29231	4.1249e-05	yes	biliverdin reductase B (flavin reductase (NADPH)) [Source:ZFIN;Acc:ZDB-GENE-030131-1516]
ENSDART00000139962	-1.30546	0.0021843	yes	PRKC, apoptosis, WT1, regulator [Source:ZFIN;Acc:ZDB-GENE-041010-108]
ENSDART00000006216	-1.31095	7.0392e-19	yes	phosphatidic acid phosphatase type 2C [Source:HGNC Symbol;Acc:HGNC:9230]
ENSDART00000125019	-1.31651	0.0017833	yes	24-dehydrocholesterol reductase [Source:ZFIN;Acc:ZDB-GENE-041212-73]
ENSDART00000098878	-1.31939	0.008752	yes	polymerase (RNA) II (DNA directed) polypeptide I [Source:ZFIN;Acc:ZDB-GENE-041010-106]
ENSDART00000082458	-1.32085	1.7312e-05	yes	SAP domain containing ribonucleoprotein [Source:ZFIN;Acc:ZDB-GENE-050522-161]
ENSDART00000109896	-1.32367	0.0037394	yes	cardiotrophin-like cytokine factor 1 [Source:ZFIN;Acc:ZDB-GENE-110411-244]
ENSDART00000079398	-1.32378	0.0030648	yes	guanine nucleotide binding protein (G protein), gamma 2 [Source:ZFIN;Acc:ZDB-GENE-050417-59]
ENSDART00000019076	-1.32732	0.00091206	yes	VAMP (vesicle-associated membrane protein)-associated protein A [Source:ZFIN;Acc:ZDB-GENE-030131-6540]
ENSDART00000130514	-1.33592	2.9118e-07	yes	echinoderm microtubule associated protein like 4 [Source:HGNC Symbol;Acc:HGNC:1316]
ENSDART00000137365	-1.35421	0.0030648	yes	growth factor receptor-bound protein 10b [Source:ZFIN;Acc:ZDB-GENE-091020-12]
ENSDART00000123331	-1.35826	0.0052833	yes	serine peptidase inhibitor, Kunitz type 1 b [Source:ZFIN;Acc:ZDB-GENE-071218-1]
ENSDART00000092665	-1.36232	0.0012786	yes	sterol regulatory element binding transcription factor 1 [Source:ZFIN;Acc:ZDB-GENE-090812-3]
ENSDART00000144447	-1.39696	0.0024686	yes	zgc:162944 [Source:ZFIN;Acc:ZDB-GENE-070424-75]
ENSDART00000126602	-1.41118	0.00014344	yes	basal cell adhesion molecule (Lutheran blood group) [Source:ZFIN;Acc:ZDB-GENE-060929-620]
ENSDART00000047461	-1.41133	6.0072e-07	yes	major facilitator superfamily domain containing 2ab [Source:ZFIN;Acc:ZDB-GENE-040801-89]
ENSDART00000132286	-1.41754	0.0028925	yes	microsomal glutathione S-transferase 1.2 [Source:ZFIN;Acc:ZDB-GENE-040704-59]
ENSDART00000137147	-1.41757	0.00071309	yes	nuclear protein 1 [Source:ZFIN;Acc:ZDB-GENE-030131-4653]
ENSDART00000149304	-1.42045	0.0068472	yes	cell division cycle 34 homolog (S. cerevisiae) a [Source:ZFIN;Acc:ZDB-GENE-040426-713]
ENSDART00000093249	-1.42226	2.1668e-05	yes	Uncharacterized protein [Source:UniProtKB/TrEMBL;Acc:E7F3H5]
ENSDART00000041886	-1.42657	0.0014325	yes	ring finger protein 130 [Source:HGNC Symbol;Acc:HGNC:18280]
ENSDART00000152874	-1.43019	9.3654e-11	yes	Uncharacterized protein [Source:UniProtKB/TrEMBL;Acc:U3JAK9]
ENSDART00000133794	-1.43172	0.0050186	yes	MAP kinase-interacting serine/threonine kinase 2b [Source:ZFIN;Acc:ZDB-GENE-030829-2]
ENSDART00000051621	-1.43684	0.005877	yes	phosphoglycerate mutase family member 5 [Source:ZFIN;Acc:ZDB-GENE-030131-683]
ENSDART00000126397	-1.45402	0.00024435	yes	tetraspanin 4a [Source:ZFIN;Acc:ZDB-GENE-040718-38]
ENSDART00000115354	-1.45654	0.0019493	yes	si:dkey-188i13.10 [Source:ZFIN;Acc:ZDB-GENE-090313-208]
ENSDART00000030976	-1.45913	9.7956e-05	yes	interleukin 11 receptor, alpha [Source:ZFIN;Acc:ZDB-GENE-030131-5942]
ENSDART00000145448	-1.46572	0.0022598	yes	anaphase promoting complex subunit 13 [Source:ZFIN;Acc:ZDB-GENE-091204-298]
ENSDART00000129378	-1.47157	0.0019493	yes	semaphorin 3gb [Source:ZFIN;Acc:ZDB-GENE-050513-4]
ENSDART00000098415	-1.47742	0.0028925	yes	inhibitor of growth family, member 5b [Source:ZFIN;Acc:ZDB-GENE-030616-462]
ENSDART00000113384	-1.47948	0.0087519	yes	LYR motif containing 4 [Source:ZFIN;Acc:ZDB-GENE-081104-295]
ENSDART00000013363	-1.48441	0.00048661	yes	solute carrier organic anion transporter family, member 3A1 [Source:ZFIN;Acc:ZDB-GENE-030131-8662]
ENSDART00000055794	-1.493	1.5069e-15	yes	cytoglobin 1 [Source:ZFIN;Acc:ZDB-GENE-020513-1]
ENSDART00000108718	-1.49585	0.00016683	yes	polymerase (RNA) II (DNA directed) polypeptide D [Source:ZFIN;Acc:ZDB-GENE-040714-2]
ENSDART00000046781	-1.49903	2.4438e-06	yes	ring finger protein 185 [Source:ZFIN;Acc:ZDB-GENE-040426-1977]
ENSDART00000064082	-1.49973	0.0019493	yes	solute carrier family 6 (neurotransmitter transporter, taurine), member 6b [Source:ZFIN;Acc:ZDB-GENE-030131-3077]
ENSDART00000127912	-1.50135	0.0033767	yes	discs, large homolog 5 (Drosophila) [Source:HGNC Symbol;Acc:HGNC:2904]
ENSDART00000001359	-1.50152	0.005877	yes	proteasome (prosome, macropain) subunit, beta type, 11 [Source:ZFIN;Acc:ZDB-GENE-001208-1]
ENSDART00000130435	-1.50387	0.00083379	yes	HMG box domain containing 4b [Source:ZFIN;Acc:ZDB-GENE-030131-450]
ENSDART00000079452	-1.50762	0.0011297	yes	lysozyme g-like 1 [Source:ZFIN;Acc:ZDB-GENE-040718-461]
ENSDART00000085636	-1.51489	0.00019354	yes	GTPase-activating Rap/Ran-GAP domain-like protein 3-like (garnl3), mRNA [Source:RefSeq mRNA;Acc:NM_001128527]
ENSDART00000139560	-1.54037	0.0029804	yes	protein phosphatase 3 (formerly 2B), regulatory s1ubunit B, alpha isoform, a [Source:ZFIN;Acc:ZDB-GENE-081113-3]
ENSDART00000006489	-1.55242	7.8919e-10	yes	acyl-CoA synthetase long-chain family member 4a [Source:ZFIN;Acc:ZDB-GENE-040426-1565]
ENSDART00000075170	-1.55843	0.0090788	yes	pituitary tumor-transforming 1 [Source:ZFIN;Acc:ZDB-GENE-081104-345]
ENSDART00000131014	-1.56729	0.0045298	yes	Uncharacterized protein [Source:UniProtKB/TrEMBL;Acc:F1QUG1]
ENSDART00000031597	-1.58224	0.0026047	yes	proteasome (prosome, macropain) inhibitor subunit 1 [Source:ZFIN;Acc:ZDB-GENE-040718-282]
ENSDART00000134564	-1.58374	0.0029803	yes	serine/arginine-rich splicing factor 5b [Source:ZFIN;Acc:ZDB-GENE-040718-354]
ENSDART00000130051	-1.58763	0.0079225	yes	Uncharacterized protein [Source:UniProtKB/TrEMBL;Acc:E7F457]
ENSDART00000144145	-1.59818	0.00099728	yes	sema domain, immunoglobulin domain (Ig), transmembrane domain (TM) and short cytoplasmic domain, (semaphorin) 4Ba [Source:ZFIN;Acc:ZDB-GENE-070705-31]
ENSDART00000145940	-1.59873	0.00017314	yes	mitochondrial calcium uptake 1 [Source:ZFIN;Acc:ZDB-GENE-070410-22]
ENSDART00000033716	-1.60297	1.6328e-17	yes	suppressor of cytokine signaling 3a [Source:ZFIN;Acc:ZDB-GENE-030131-7349]
ENSDART00000151306	-1.6146	0.0058713	yes	polymerase (DNA-directed), delta 3, accessory subunit [Source:ZFIN;Acc:ZDB-GENE-060512-59]
ENSDART00000138674	-1.61996	0.00033815	yes	plectin b [Source:ZFIN;Acc:ZDB-GENE-100917-2]
ENSDART00000133344	-1.62177	0.00011578	yes	RELT tumor necrosis factor receptor [Source:ZFIN;Acc:ZDB-GENE-040426-2361]
ENSDART00000135566	-1.62191	0.00013147	yes	si:dkey-9i23.11 [Source:ZFIN;Acc:ZDB-GENE-030131-3489]
ENSDART00000101282	-1.62573	0.0009973	yes	breakpoint cluster region [Source:ZFIN;Acc:ZDB-GENE-040724-43]
ENSDART00000140423	-1.62758	0.00022441	yes	transmembrane protein 14A [Source:HGNC Symbol;Acc:HGNC:21076]
ENSDART00000060650	-1.62798	0.0019512	yes	FCF1 rRNA-processing protein [Source:HGNC Symbol;Acc:HGNC:20220]
ENSDART00000014515	-1.62946	0.00087255	yes	dual specificity phosphatase 1 [Source:ZFIN;Acc:ZDB-GENE-040426-2018]
ENSDART00000080016	-1.63069	0.0019512	yes	protein phosphatase 3, catalytic subunit, gamma isozyme, b [Source:ZFIN;Acc:ZDB-GENE-070112-1102]
ENSDART00000047419	-1.63982	0.0009973	yes	casein kinase 1, gamma 1 [Source:ZFIN;Acc:ZDB-GENE-041212-63]
ENSDART00000147252	-1.64131	0.0079224	yes	B double prime 1, subunit of RNA polymerase III transcription initiation factor IIIB [Source:HGNC Symbol;Acc:HGNC:13652]
ENSDART00000098545	-1.67522	0.0012715	yes	transmembrane protein 150A [Source:ZFIN;Acc:ZDB-GENE-060825-321]
ENSDART00000123731	-1.68661	0.00038385	yes	O-linked N-acetylglucosamine (GlcNAc) transferase, tandem duplicate 1 [Source:ZFIN;Acc:ZDB-GENE-030131-9631]
ENSDART00000012120	-1.68985	0.0019512	yes	acyl-CoA synthetase bubblegum family member 2 [Source:ZFIN;Acc:ZDB-GENE-030131-7099]
ENSDART00000058415	-1.6911	3.0184e-05	yes	GDNF family receptor alpha 1 [Source:HGNC Symbol;Acc:HGNC:4243]
ENSDART00000130682	-1.6926	0.0058713	yes	mediator complex subunit 8 [Source:HGNC Symbol;Acc:HGNC:19971]
ENSDART00000052423	-1.70781	0.0090788	yes	sprouty homolog 2 [Source:ZFIN;Acc:ZDB-GENE-030131-7038]
ENSDART00000137791	-1.70878	0.0033772	yes	CDGSH iron sulfur domain 2 [Source:ZFIN;Acc:ZDB-GENE-040426-1381]
ENSDART00000098288	-1.71158	0.0012715	yes	Fas (tnfrsf6)-associated via death domain [Source:ZFIN;Acc:ZDB-GENE-070606-3]
ENSDART00000142465	-1.72018	0.00022441	yes	ATP-binding cassette, sub-family A (ABC1), member 1A [Source:ZFIN;Acc:ZDB-GENE-031006-12]
ENSDART00000134337	-1.72102	0.0065402	yes	exocyst complex component 2 [Source:ZFIN;Acc:ZDB-GENE-040426-1160]
ENSDART00000122864	-1.73221	0.0033773	yes	si:dkey-108k21.11 [Source:ZFIN;Acc:ZDB-GENE-131127-105]
ENSDART00000138511	-1.73596	0.0033773	yes	kinesin family member C3 [Source:ZFIN;Acc:ZDB-GENE-030131-3724]
ENSDART00000135444	-1.75094	0.0065402	yes	tubulin folding cofactor B [Source:ZFIN;Acc:ZDB-GENE-030131-9296]
ENSDART00000098284	-1.75437	0.0037773	yes	finTRIM family, member 14 [Source:ZFIN;Acc:ZDB-GENE-060512-201]
ENSDART00000153646	-1.78602	0.0021884	yes	si:ch211-286b4.4 [Source:ZFIN;Acc:ZDB-GENE-131127-605]
ENSDART00000157142	-1.79075	0.0037772	yes	TEA domain family member 3 b [Source:ZFIN;Acc:ZDB-GENE-080103-3]
ENSDART00000152158	-1.79315	0.0037772	yes	CD97 molecule [Source:HGNC Symbol;Acc:HGNC:1711]
ENSDART00000004220	-1.79358	0.0019511	yes	RAB34, member RAS oncogene family a [Source:ZFIN;Acc:ZDB-GENE-041010-197]
ENSDART00000102482	-1.80898	0.00082509	yes	enhancer of yellow 2 homolog (Drosophila) [Source:ZFIN;Acc:ZDB-GENE-040718-124]
ENSDART00000145446	-1.81935	0.00012014	yes	atypical chemokine receptor 4a [Source:ZFIN;Acc:ZDB-GENE-070301-6]
ENSDART00000145621	-1.82996	8.1529e-08	yes	serum/glucocorticoid regulated kinase 1 [Source:ZFIN;Acc:ZDB-GENE-030131-2860]
ENSDART00000113224	-1.84137	0.00012014	yes	guanine nucleotide binding protein (G protein), alpha 13a [Source:ZFIN;Acc:ZDB-GENE-030131-5024]
ENSDART00000123121	-1.84342	4.1447e-06	yes	glypican 1 [Source:HGNC Symbol;Acc:HGNC:4449]
ENSDART00000074113	-1.84741	0.0058713	yes	si:dkey-183g16.1 [Source:ZFIN;Acc:ZDB-GENE-070705-327]
ENSDART00000123643	-1.85122	0.0041487	yes	si:ch211-69g19.2 [Source:ZFIN;Acc:ZDB-GENE-030804-13]
ENSDART00000148693	-1.85792	0.0071154	yes	stimulated by retinoic acid 13 homolog (mouse) [Source:ZFIN;Acc:ZDB-GENE-110411-78]
ENSDART00000124121	-1.86836	2.1817e-20	yes	si:dkey-108k21.23 [Source:ZFIN;Acc:ZDB-GENE-131121-114]
ENSDART00000078459	-1.87725	0.00053332	yes	transmembrane protein 55A [Source:ZFIN;Acc:ZDB-GENE-060503-854]
ENSDART00000114907	-1.88523	0.0065402	yes	cytokine receptor family member B13 [Source:ZFIN;Acc:ZDB-GENE-071120-8]
ENSDART00000155829	-1.89009	0.0026204	yes	cytochrome c oxidase subunit VIb polypeptide 2 [Source:ZFIN;Acc:ZDB-GENE-040426-1566]
ENSDART00000135509	-1.89837	3.001e-05	yes	fission 1 (mitochondrial outer membrane) homolog (S. cerevisiae) [Source:HGNC Symbol;Acc:HGNC:21689]
ENSDART00000131886	-1.90269	0.0015423	yes	solute carrier family 25, member 48 [Source:ZFIN;Acc:ZDB-GENE-040718-60]
ENSDART00000090191	-1.90857	0.0037772	yes	folliculin [Source:ZFIN;Acc:ZDB-GENE-060421-3470]
ENSDART00000019770	-1.91225	0.0026204	yes	glycoprotein M6Ba [Source:ZFIN;Acc:ZDB-GENE-030710-9]
ENSDART00000042162	-1.91786	0.0041487	yes	transmembrane 7 superfamily member 2 [Source:ZFIN;Acc:ZDB-GENE-041212-19]
ENSDART00000152426	-1.92754	0.0071153	yes	PCI domain containing 2 [Source:ZFIN;Acc:ZDB-GENE-041114-79]
ENSDART00000103828	-1.93241	0.0026204	yes	Uncharacterized protein [Source:UniProtKB/TrEMBL;Acc:E7F410]
ENSDART00000138264	-1.94016	5.4107e-05	yes	si:ch211-183d21.1 [Source:ZFIN;Acc:ZDB-GENE-030131-8516]
ENSDART00000048281	-1.94433	0.004439	yes	cytochrome P450, family 2, subfamily U, polypeptide 1 [Source:ZFIN;Acc:ZDB-GENE-070730-1]
ENSDART00000125308	-1.94828	3.1359e-06	yes	Uncharacterized protein [Source:UniProtKB/TrEMBL;Acc:E7EZB2]
ENSDART00000064597	-1.9509	0.0044391	yes	lectin, galactoside-binding, soluble, 3 (galectin 3)-like [Source:ZFIN;Acc:ZDB-GENE-030131-4324]
ENSDART00000076503	-1.96534	0.0044391	yes	adaptor-related protein complex 1, gamma 2 subunit [Source:ZFIN;Acc:ZDB-GENE-030616-587]
ENSDART00000148432	-1.97047	0.0041486	yes	protein tyrosine phosphatase type IVA, member 3 [Source:ZFIN;Acc:ZDB-GENE-040426-2220]
ENSDART00000073707	-1.99286	0.0027596	yes	syntaxin 3A [Source:ZFIN;Acc:ZDB-GENE-040426-1489]
ENSDART00000134724	-2.03403	0.0044391	yes	Sjogren syndrome nuclear autoantigen 1 [Source:ZFIN;Acc:ZDB-GENE-081104-255]
ENSDART00000060243	-2.06743	0.0045664	yes	cystic fibrosis transmembrane conductance regulator, ATP-binding cassette (sub-family C, member 7) [Source:ZFIN;Acc:ZDB-GENE-050517-20]
ENSDART00000132610	-2.07176	0.0027596	yes	zgc:174888 [Source:ZFIN;Acc:ZDB-GENE-030328-33]
ENSDART00000155124	-2.07475	0.00014929	yes	protein tyrosine phosphatase, receptor type, f, b [Source:ZFIN;Acc:ZDB-GENE-060503-530]
ENSDART00000074101	-2.07585	0.0015423	yes	si:dkey-183g16.2 [Source:ZFIN;Acc:ZDB-GENE-070705-328]
ENSDART00000084664	-2.08132	0.0003914	yes	Uncharacterized protein [Source:UniProtKB/TrEMBL;Acc:E7EZB6]
ENSDART00000139648	-2.09225	0.0071154	yes	tRNA methyltransferase 1 homolog (S. cerevisiae)-like [Source:ZFIN;Acc:ZDB-GENE-041014-189]
ENSDART00000097155	-2.09825	2.0026e-13	yes	Uncharacterized protein [Source:UniProtKB/TrEMBL;Acc:E7F0K9]
ENSDART00000053026	-2.1019	0.0045664	yes	family with sequence similarity 122B [Source:ZFIN;Acc:ZDB-GENE-040801-204]
ENSDART00000083305	-2.11263	0.0071154	yes	solute carrier family 19 (thiamine transporter), member 2 [Source:ZFIN;Acc:ZDB-GENE-110411-262]
ENSDART00000109157	-2.13269	0.00097969	yes	F-box and leucine-rich repeat protein 6 [Source:HGNC Symbol;Acc:HGNC:13603]
ENSDART00000077495	-2.14035	0.0027596	yes	polymerase (RNA) II (DNA directed) polypeptide A [Source:ZFIN;Acc:ZDB-GENE-041008-78]
ENSDART00000121991	-2.14104	0.00040317	yes	alveolar soft part sarcoma chromosome region, candidate 1 [Source:ZFIN;Acc:ZDB-GENE-050417-31]
ENSDART00000058890	-2.16846	0.0045664	yes	epoxide hydrolase 2, cytoplasmic [Source:ZFIN;Acc:ZDB-GENE-041212-70]
ENSDART00000141465	-2.18309	0.0016489	yes	homocysteine-inducible, endoplasmic reticulum stress-inducible, ubiquitin-like domain member 1 [Source:ZFIN;Acc:ZDB-GENE-050913-47]
ENSDART00000152837	-2.19402	0.0002463	yes	F-box protein 11a [Source:ZFIN;Acc:ZDB-GENE-061103-70]
ENSDART00000148601	-2.20116	0.0010341	yes	insulin induced gene 1 [Source:ZFIN;Acc:ZDB-GENE-030131-6121]
ENSDART00000087438	-2.21961	0.004439	yes	component of oligomeric golgi complex 7 [Source:ZFIN;Acc:ZDB-GENE-061013-463]
ENSDART00000129379	-2.22549	8.8824e-08	yes	Uncharacterized protein [Source:UniProtKB/TrEMBL;Acc:E7F5J5]
ENSDART00000153207	-2.2275	6.833e-18	yes	influenza virus NS1A binding protein a [Source:ZFIN;Acc:ZDB-GENE-031222-2]
ENSDART00000097625	-2.23818	0.00015459	yes	heat shock protein family B (small), member 11 [Source:HGNC Symbol;Acc:HGNC:25019]
ENSDART00000125650	-2.24086	0.004439	yes	Uncharacterized protein [Source:UniProtKB/TrEMBL;Acc:E7EYS9]
ENSDART00000103100	-2.25727	0.0074646	yes	chromobox homolog 8b [Source:ZFIN;Acc:ZDB-GENE-050522-325]
ENSDART00000130294	-2.26246	0.0027596	yes	Uncharacterized protein [Source:UniProtKB/TrEMBL;Acc:F1QH24]
ENSDART00000042100	-2.27068	0.0002463	yes	homeodomain leucine zipper gene [Source:ZFIN;Acc:ZDB-GENE-030616-592]
ENSDART00000130741	-2.28403	0.0002508	yes	family with sequence similarity 20, member Cb [Source:ZFIN;Acc:ZDB-GENE-050301-4]
ENSDART00000113792	-2.32531	3.5546e-07	yes	si:ch73-387e10.3 [Source:ZFIN;Acc:ZDB-GENE-091204-292]
ENSDART00000127042	-2.35107	0.00065182	yes	H2A histone family, member X [Source:HGNC Symbol;Acc:HGNC:4739]
ENSDART00000152856	-2.35765	0.0017102	yes	enabled homolog (Drosophila) [Source:ZFIN;Acc:ZDB-GENE-010323-11]
ENSDART00000006990	-2.36094	0.0002508	yes	ELOVL family member 5, elongation of long chain fatty acids (yeast) [Source:ZFIN;Acc:ZDB-GENE-040407-2]
ENSDART00000022484	-2.36391	0.0004011	yes	ring finger protein, transmembrane 1 [Source:ZFIN;Acc:ZDB-GENE-040426-2324]
ENSDART00000109809	-2.36755	0.00024638	yes	SH3-domain kinase binding protein 1 [Source:ZFIN;Acc:ZDB-GENE-091204-186]
ENSDART00000049204	-2.36784	2.2781e-06	yes	kinase insert domain receptor (a type III receptor tyrosine kinase) [Source:ZFIN;Acc:ZDB-GENE-041001-112]
ENSDART00000022060	-2.36839	0.0073754	yes	activating transcription factor 3 [Source:ZFIN;Acc:ZDB-GENE-040426-728]
ENSDART00000142088	-2.36899	3.5501e-07	yes	si:ch211-218c6.8 [Source:ZFIN;Acc:ZDB-GENE-050419-103]
ENSDART00000142878	-2.38071	0.0073754	yes	chromosome 17 open reading frame 75 [Source:HGNC Symbol;Acc:HGNC:30173]
ENSDART00000064150	-2.38304	0.0074646	yes	SAYSVFN motif domain containing 1 [Source:HGNC Symbol;Acc:HGNC:21025]
ENSDART00000114855	-2.38809	0.0002508	yes	NADH dehydrogenase (ubiquinone) 1 alpha subcomplex, 13 [Source:ZFIN;Acc:ZDB-GENE-040426-1672]
ENSDART00000133833	-2.38904	0.0044104	yes	rhophilin, Rho GTPase binding protein 2 [Source:ZFIN;Acc:ZDB-GENE-030131-9927]
ENSDART00000021396	-2.40273	3.8573e-14	yes	low density lipoprotein receptor adaptor protein 1a [Source:ZFIN;Acc:ZDB-GENE-030328-13]
ENSDART00000084724	-2.41556	0.0044104	yes	farnesyl-diphosphate farnesyltransferase 1 [Source:HGNC Symbol;Acc:HGNC:3629]
ENSDART00000152615	-2.42733	0.0073754	yes	zgc:63691 [Source:ZFIN;Acc:ZDB-GENE-040426-1240]
ENSDART00000146299	-2.44576	0.0074646	yes	slit (Drosophila) homolog 3 [Source:ZFIN;Acc:ZDB-GENE-010306-4]
ENSDART00000055968	-2.45085	9.2327e-06	yes	runt-related transcription factor 1 [Source:ZFIN;Acc:ZDB-GENE-000605-1]
ENSDART00000104768	-2.4561	0.001057	yes	paroxysmal nonkinesigenic dyskinesia [Source:ZFIN;Acc:ZDB-GENE-050208-278]
ENSDART00000123634	-2.4587	3.5357e-10	yes	NADH dehydrogenase (ubiquinone) 1 beta subcomplex, 1, 7kDa [Source:HGNC Symbol;Acc:HGNC:7695]
ENSDART00000147468	-2.45917	0.0027869	yes	3-hydroxybutyrate dehydrogenase, type 1 [Source:ZFIN;Acc:ZDB-GENE-070410-130]
ENSDART00000019396	-2.46934	5.5215e-09	yes	chloride intracellular channel 2 [Source:ZFIN;Acc:ZDB-GENE-040718-299]
ENSDART00000055336	-2.48546	0.0026362	yes	DENN/MADD domain containing 1A [Source:ZFIN;Acc:ZDB-GENE-060404-6]
ENSDART00000145821	-2.499	0.0004011	yes	si:rp71-36a1.3 [Source:ZFIN;Acc:ZDB-GENE-050208-566]
ENSDART00000146057	-2.52149	0.0045664	yes	cell division cycle associated 4 [Source:HGNC Symbol;Acc:HGNC:14625]
ENSDART00000149984	-2.54656	0.0010322	yes	interferon regulatory factor 2a [Source:ZFIN;Acc:ZDB-GENE-030131-4135]
ENSDART00000136174	-2.54828	5.9638e-05	yes	cytochrome P450, family 3, subfamily c, polypeptide 1 [Source:ZFIN;Acc:ZDB-GENE-030131-3060]
ENSDART00000067423	-2.57963	0.0045664	yes	fibroblast growth factor receptor substrate 2a [Source:ZFIN;Acc:ZDB-GENE-060503-462]
ENSDART00000074991	-2.5853	2.2699e-05	yes	Uncharacterized protein [Source:UniProtKB/TrEMBL;Acc:F1Q8Q5]
ENSDART00000077715	-2.58738	0.0044104	yes	si:dkey-25e12.3 [Source:ZFIN;Acc:ZDB-GENE-041001-132]
ENSDART00000114885	-2.64352	0.0073754	yes	aldehyde dehydrogenase 3 family, member A2b [Source:ZFIN;Acc:ZDB-GENE-040912-103]
ENSDART00000145587	-2.64435	0.0044103	yes	integrin linked kinase [Source:ZFIN;Acc:ZDB-GENE-040426-1435]
ENSDART00000101201	-2.66851	0.0073754	yes	transmembrane protein 223 [Source:ZFIN;Acc:ZDB-GENE-040801-113]
ENSDART00000111184	-2.67846	0.0015753	yes	UTP18 small subunit (SSU) processome component homolog (yeast) [Source:ZFIN;Acc:ZDB-GENE-060929-668]
ENSDART00000103898	-2.68253	0.0026361	yes	steroid-5-alpha-reductase, alpha polypeptide 1 (3-oxo-5 alpha-steroid delta 4-dehydrogenase alpha 1) [Source:ZFIN;Acc:ZDB-GENE-060929-938]
ENSDART00000143337	-2.68362	1.3975e-05	yes	si:ch211-132g1.3 [Source:ZFIN;Acc:ZDB-GENE-090312-148]
ENSDART00000127662	-2.69884	0.00023038	yes	Uncharacterized protein [Source:UniProtKB/TrEMBL;Acc:E7F027]
ENSDART00000075792	-2.75671	0.0044104	yes	G protein-coupled receptor 68 [Source:HGNC Symbol;Acc:HGNC:4519]
ENSDART00000136784	-2.79971	5.0239e-07	yes	sterile alpha motif domain containing 10a [Source:ZFIN;Acc:ZDB-GENE-080204-53]
ENSDART00000080781	-2.80432	0.0009412	yes	ADP-ribosylation factor-like 15b [Source:ZFIN;Acc:ZDB-GENE-080813-2]
ENSDART00000097705	-2.82838	0.0026362	yes	protein tyrosine phosphatase, non-receptor type 21 [Source:ZFIN;Acc:ZDB-GENE-080102-4]
ENSDART00000058735	-2.83046	0.0044104	yes	glycosyltransferase 8 domain containing 1 [Source:ZFIN;Acc:ZDB-GENE-041114-23]
ENSDART00000122398	-2.84633	0.0026362	yes	Uncharacterized protein [Source:UniProtKB/TrEMBL;Acc:E7F6Q0]
ENSDART00000061955	-2.86253	0.0065358	yes	zgc:66286 [Source:ZFIN;Acc:ZDB-GENE-040426-1593]
ENSDART00000073676	-2.98058	5.1021e-05	yes	iron-sulfur cluster assembly 1 [Source:ZFIN;Acc:ZDB-GENE-050626-94]
ENSDART00000057463	-2.98383	0.0038154	yes	prostate transmembrane protein, androgen induced 1 [Source:ZFIN;Acc:ZDB-GENE-040718-320]
ENSDART00000121498	-3.0022	0.0038154	yes	NMDA receptor regulated 2 [Source:ZFIN;Acc:ZDB-GENE-060306-1]
ENSDART00000131260	-3.0057	0.0009412	yes	THO complex 2 [Source:ZFIN;Acc:ZDB-GENE-030616-54]
ENSDART00000132165	-3.04496	0.0022327	yes	thrombospondin 4b [Source:ZFIN;Acc:ZDB-GENE-020708-4]
ENSDART00000136067	-3.04615	0.0044103	yes	si:ch73-18b11.1 [Source:ZFIN;Acc:ZDB-GENE-070912-332]
ENSDART00000008808	-3.05395	0.00013948	yes	homeobox containing 1 b [Source:ZFIN;Acc:ZDB-GENE-090908-4]
ENSDART00000131192	-3.05783	0.00013948	yes	Uncharacterized protein [Source:UniProtKB/TrEMBL;Acc:E7F695]
ENSDART00000050006	-3.07197	2.9563e-24	yes	stearoyl-CoA desaturase (delta-9-desaturase) [Source:ZFIN;Acc:ZDB-GENE-031106-3]
ENSDART00000122985	-3.09558	0.009347	yes	interleukin 2 receptor, beta [Source:ZFIN;Acc:ZDB-GENE-080108-2]
ENSDART00000040998	-3.0988	0.0038154	yes	mitochondrial fission process 1 [Source:HGNC Symbol;Acc:HGNC:26945]
ENSDART00000129222	-3.13415	0.0015753	yes	retinoic acid receptor gamma a [Source:ZFIN;Acc:ZDB-GENE-980526-531]
ENSDART00000083633	-3.14211	1.7648e-06	yes	exosome component 1 [Source:ZFIN;Acc:ZDB-GENE-080926-3]
ENSDART00000048985	-3.14643	0.0022327	yes	ventricular zone expressed PH domain protein [Source:ZFIN;Acc:ZDB-GENE-041014-375]
ENSDART00000140577	-3.16731	0.00094121	yes	zgc:64085 [Source:ZFIN;Acc:ZDB-GENE-040426-1362]
ENSDART00000131927	-3.17256	0.0065358	yes	caspase 3, apoptosis-related cysteine protease a [Source:ZFIN;Acc:ZDB-GENE-011210-1]
ENSDART00000147420	-3.22665	0.00056235	yes	sphingosine-1-phosphate lyase 1 [Source:ZFIN;Acc:ZDB-GENE-070410-24]
ENSDART00000133508	-3.24534	0.0065358	yes	Yip1 domain family, member 1 [Source:ZFIN;Acc:ZDB-GENE-040822-35]
ENSDART00000138734	-3.26487	3.0831e-05	yes	zinc finger protein 395a [Source:ZFIN;Acc:ZDB-GENE-061215-52]
ENSDART00000140182	-3.26613	3.2413e-08	yes	CCR4-NOT transcription complex, subunit 4 [Source:HGNC Symbol;Acc:HGNC:7880]
ENSDART00000008898	-3.29511	0.0065357	yes	forkhead box M1 [Source:ZFIN;Acc:ZDB-GENE-040426-1275]
ENSDART00000142038	-3.31199	0.00012	yes	cap methyltransferase 1 [Source:ZFIN;Acc:ZDB-GENE-040426-696]
ENSDART00000112030	-3.33949	1.1244e-05	yes	sirtuin 5 [Source:HGNC Symbol;Acc:HGNC:14933]
ENSDART00000079346	-3.34937	1.8623e-05	yes	zgc:112320 [Source:ZFIN;Acc:ZDB-GENE-050522-144]
ENSDART00000126889	-3.36848	5.3488e-08	yes	cyclin A2 [Source:HGNC Symbol;Acc:HGNC:1578]
ENSDART00000075491	-3.3884	0.0065357	yes	processing of precursor 5, ribonuclease P/MRP subunit (S. cerevisiae) [Source:ZFIN;Acc:ZDB-GENE-050320-123]
ENSDART00000124654	-3.48734	0.00011999	yes	ATPase type 13A5 [Source:HGNC Symbol;Acc:HGNC:31789]
ENSDART00000012146	-3.52149	0.0038154	yes	solute carrier family 39 (zinc transporter), member 3 [Source:ZFIN;Acc:ZDB-GENE-060315-9]
ENSDART00000102196	-3.62005	0.0065357	yes	si:dkey-281i8.1 [Source:ZFIN;Acc:ZDB-GENE-060503-70]
ENSDART00000137096	-3.63642	0.0038154	yes	optic atrophy 1 (human) [Source:ZFIN;Acc:ZDB-GENE-041114-7]
ENSDART00000127059	-3.71012	0.00076929	yes	Uncharacterized protein [Source:UniProtKB/TrEMBL;Acc:E7FGA9]
ENSDART00000148482	-3.74388	0.0038154	yes	acetyl-Coenzyme A carboxylase alpha [Source:ZFIN;Acc:ZDB-GENE-060526-74]
ENSDART00000157279	-3.79248	0.0080361	yes	si:dkey-7i4.21 [Source:ZFIN;Acc:ZDB-GENE-131121-50]
ENSDART00000153009	-3.82674	0.0065358	yes	heat shock factor 2 [Source:ZFIN;Acc:ZDB-GENE-011128-1]
ENSDART00000144131	-3.86751	0.0080361	yes	sphingomyelin phosphodiesterase 4 [Source:ZFIN;Acc:ZDB-GENE-040426-2672]
ENSDART00000144899	-3.9675	0.0065357	yes	SET domain containing 4 [Source:ZFIN;Acc:ZDB-GENE-050808-2]
ENSDART00000083879	-3.98439	0.0046033	yes	transmembrane protein 161A [Source:ZFIN;Acc:ZDB-GENE-041111-267]
ENSDART00000045177	-3.99804	0.0013093	yes	cyclin-dependent kinase 10 [Source:ZFIN;Acc:ZDB-GENE-050417-94]
ENSDART00000141237	-4.04817	0.0080361	yes	si:dkeyp-113d7.10 [Source:ZFIN;Acc:ZDB-GENE-061207-80]
ENSDART00000023539	-4.08997	0.0022327	yes	cytochrome b-245, alpha polypeptide [Source:ZFIN;Acc:ZDB-GENE-040426-1526]
ENSDART00000123038	-4.09111	0.0080361	yes	Uncharacterized protein [Source:UniProtKB/TrEMBL;Acc:E7F0Z1]
ENSDART00000052773	-4.13916	0.002652	yes	exocyst complex component 6B [Source:ZFIN;Acc:ZDB-GENE-060929-132]
ENSDART00000146227	-4.18676	0.0080361	yes	solute carrier family 24 (sodium/potassium/calcium exchanger), member 3 [Source:ZFIN;Acc:ZDB-GENE-090312-67]
ENSDART00000087520	-4.25622	0.0038154	yes	succinate-CoA ligase, GDP-forming, beta subunit [Source:ZFIN;Acc:ZDB-GENE-030114-3]
ENSDART00000134789	-4.28568	0.0022327	yes	si:dkeyp-77c8.2 [Source:ZFIN;Acc:ZDB-GENE-090313-398]
ENSDART00000042599	-4.31966	0.0080361	yes	DENN/MADD domain containing 6Aa [Source:ZFIN;Acc:ZDB-GENE-041010-63]
ENSDART00000077978	-4.34615	0.0080361	yes	S100 calcium binding protein T [Source:ZFIN;Acc:ZDB-GENE-050320-61]
ENSDART00000097494	-4.35157	2.4045e-06	yes	histidine triad nucleotide binding protein 2 [Source:ZFIN;Acc:ZDB-GENE-070410-139]
ENSDART00000060853	-4.3764	0.0046033	yes	peroxisome biogenesis factor 10 [Source:ZFIN;Acc:ZDB-GENE-041010-71]
ENSDART00000151159	-4.3764	0.0015348	yes	3-hydroxyisobutyrate dehydrogenase a [Source:ZFIN;Acc:ZDB-GENE-040801-264]
ENSDART00000145058	-4.46956	0.002652	yes	si:ch73-299h12.9 [Source:ZFIN;Acc:ZDB-GENE-081031-87]
ENSDART00000114062	-4.51256	0.0015348	yes	IMP1 inner mitochondrial membrane peptidase-like (S. cerevisiae) [Source:ZFIN;Acc:ZDB-GENE-070522-4]
ENSDART00000121547	-4.54984	5.5057e-05	yes	FCH and double SH3 domains 2 [Source:HGNC Symbol;Acc:HGNC:29114]
ENSDART00000016321	-4.55124	0.0080361	yes	retinoid x receptor, alpha b [Source:ZFIN;Acc:ZDB-GENE-990415-243]
ENSDART00000124966	-4.58997	0.002652	yes	caseinolytic mitochondrial matrix peptidase chaperone subunit [Source:HGNC Symbol;Acc:HGNC:2088]
ENSDART00000063996	-4.64265	0.00026685	yes	growth arrest and DNA-damage-inducible, alpha, a [Source:ZFIN;Acc:ZDB-GENE-040426-1501]
ENSDART00000055965	-4.65535	0.002652	yes	glutaryl-Coenzyme A dehydrogenase, like [Source:ZFIN;Acc:ZDB-GENE-041010-117]
ENSDART00000124021	-4.66071	0.00089169	yes	lon peptidase 2, peroxisomal [Source:HGNC Symbol;Acc:HGNC:20598]
ENSDART00000144741	-4.66142	0.00076928	yes	cAMP responsive element binding protein-like 2 [Source:ZFIN;Acc:ZDB-GENE-040718-456]
ENSDART00000113655	-4.67903	0.0046033	yes	transmembrane protein 26 [Source:HGNC Symbol;Acc:HGNC:28550]
ENSDART00000132254	-4.74528	0.0080361	yes	SWI/SNF related, matrix associated, actin dependent regulator of chromatin, subfamily b, member 1b [Source:ZFIN;Acc:ZDB-GENE-991008-16]
ENSDART00000124634	-4.75529	0.00026685	yes	Uncharacterized protein [Source:UniProtKB/TrEMBL;Acc:E7F331]
ENSDART00000126084	-4.75965	0.0080361	yes	Uncharacterized protein [Source:UniProtKB/TrEMBL;Acc:E7F3H1]
ENSDART00000156408	-4.79635	0.00045274	yes	leucine-zipper-like transcription regulator 1 [Source:ZFIN;Acc:ZDB-GENE-030131-9564]
ENSDART00000086117	-4.81159	0.002652	yes	potassium voltage-gated channel, shaker-related subfamily, beta member 2 [Source:HGNC Symbol;Acc:HGNC:6229]
ENSDART00000151140	-4.8545	0.002652	yes	ATPase family, AAA domain containing 5b [Source:ZFIN;Acc:ZDB-GENE-030131-338]
ENSDART00000122680	-4.86727	5.5057e-05	yes	Uncharacterized protein [Source:UniProtKB/TrEMBL;Acc:E7EYU4]
ENSDART00000127246	-4.89072	5.5056e-05	yes	Uncharacterized protein [Source:UniProtKB/TrEMBL;Acc:F1QSY9]
ENSDART00000151679	-4.94528	0.00030373	yes	apolipoprotein L, 4 [Source:HGNC Symbol;Acc:HGNC:14867]
ENSDART00000099863	-4.989	0.0080361	yes	solute carrier family 25, member 37 [Source:ZFIN;Acc:ZDB-GENE-031118-202]
ENSDART00000111175	-5.05201	0.00017793	yes	cutA divalent cation tolerance homolog (E. coli) [Source:HGNC Symbol;Acc:HGNC:21101]
ENSDART00000041751	-5.09033	0.0046033	yes	excision repair cross-complementing rodent repair deficiency, complementation group 1 [Source:ZFIN;Acc:ZDB-GENE-040426-2606]
ENSDART00000064694	-5.09752	0.0046033	yes	TatD DNase domain containing 3 [Source:HGNC Symbol;Acc:HGNC:27010]
ENSDART00000143317	-5.11614	0.0080361	yes	coiled-coil-helix-coiled-coil-helix domain containing 3 [Source:ZFIN;Acc:ZDB-GENE-030131-5005]
ENSDART00000079454	-5.20242	0.002652	yes	vesicle-associated membrane protein 2 [Source:ZFIN;Acc:ZDB-GENE-030131-8225]
ENSDART00000152587	-5.26379	0.0015348	yes	DDHD domain containing 1b [Source:ZFIN;Acc:ZDB-GENE-040724-18]
ENSDART00000146001	-5.35686	0.0015348	yes	WAS protein family, member 1 [Source:HGNC Symbol;Acc:HGNC:12732]
ENSDART00000129955	-5.36055	0.00089169	yes	wu:fd44f01 [Source:ZFIN;Acc:ZDB-GENE-030131-4633]
ENSDART00000101132	-5.37837	1.0748e-07	yes	tetraspanin 17 [Source:HGNC Symbol;Acc:HGNC:13594]
ENSDART00000122104	-5.39596	0.00089169	yes	Uncharacterized protein [Source:UniProtKB/TrEMBL;Acc:E7EYJ9]
ENSDART00000141872	-5.40641	0.0015348	yes	si:ch211-197h24.6 [Source:ZFIN;Acc:ZDB-GENE-030131-1361]
ENSDART00000121609	-5.42838	0.00010445	yes	Uncharacterized protein [Source:UniProtKB/TrEMBL;Acc:H9GYW6]
ENSDART00000052646	-5.44256	0.0080361	yes	JAZF zinc finger 1a [Source:ZFIN;Acc:ZDB-GENE-060503-492]
ENSDART00000143280	-5.4541	0.0080361	yes	SH2B adaptor protein 1 [Source:ZFIN;Acc:ZDB-GENE-070209-188]
ENSDART00000112826	-5.50807	0.00017793	yes	transmembrane protein 186 [Source:HGNC Symbol;Acc:HGNC:24530]
ENSDART00000133203	-5.59949	0.0046033	yes	leptin b [Source:ZFIN;Acc:ZDB-GENE-041210-183]
ENSDART00000124657	-5.62103	0.0046033	yes	claspin [Source:HGNC Symbol;Acc:HGNC:19715]
ENSDART00000134868	-5.62769	0.0046033	yes	zgc:113314 [Source:ZFIN;Acc:ZDB-GENE-050913-19]
ENSDART00000153324	-5.64802	0.0046033	yes	regulator of microtubule dynamics 3 [Source:ZFIN;Acc:ZDB-GENE-041014-256]
ENSDART00000137605	-5.66626	0.0080361	yes	SUN domain containing ossification factor [Source:ZFIN;Acc:ZDB-GENE-030131-2941]
ENSDART00000149484	-5.69497	0.0015348	yes	kinesin family member 11 [Source:ZFIN;Acc:ZDB-GENE-020426-1]
ENSDART00000133621	-5.747	0.0005197	yes	cyclin M1 [Source:HGNC Symbol;Acc:HGNC:102]
ENSDART00000025410	-5.78527	0.0080361	yes	zgc:109986 [Source:ZFIN;Acc:ZDB-GENE-050522-136]
ENSDART00000143435	-5.79727	0.0080361	yes	cysteine conjugate-beta lyase; cytoplasmic (glutamine transaminase K, kyneurenine aminotransferase) [Source:ZFIN;Acc:ZDB-GENE-040426-2676]
ENSDART00000110333	-5.80662	0.0026519	yes	Uncharacterized protein [Source:UniProtKB/TrEMBL;Acc:E7F1S0]
ENSDART00000059017	-5.88035	0.0015348	yes	nuclear factor of kappa light polypeptide gene enhancer in B-cells inhibitor-like 1 [Source:ZFIN;Acc:ZDB-GENE-040116-7]
ENSDART00000127287	-5.88035	5.4685e-07	yes	Uncharacterized protein [Source:UniProtKB/TrEMBL;Acc:H9GYH5]
ENSDART00000037922	-6.00364	0.0080361	yes	solute carrier family 6 (neurotransmitter transporter, creatine), member 8 [Source:ZFIN;Acc:ZDB-GENE-071024-2]
ENSDART00000108633	-6.01994	0.0046033	yes	regulatory factor X, 7 [Source:HGNC Symbol;Acc:HGNC:25777]
ENSDART00000124060	-6.06456	0.00010445	yes	ubiquitin specific peptidase like 1 [Source:ZFIN;Acc:ZDB-GENE-040930-7]
ENSDART00000127319	-6.1171	0.0015348	yes	zgc:77056 [Source:ZFIN;Acc:ZDB-GENE-030131-5248]
ENSDART00000147456	-6.30929	0.0026519	yes	Uncharacterized protein [Source:UniProtKB/TrEMBL;Acc:H9GZG5]
ENSDART00000075179	-6.4531	0.002652	yes	V-set and transmembrane domain containing 4b [Source:ZFIN;Acc:ZDB-GENE-080303-17]
ENSDART00000132508	-6.46531	0.0015348	yes	AP2 associated kinase 1 [Source:HGNC Symbol;Acc:HGNC:19679]
ENSDART00000126290	-6.50131	0.00010445	yes	family with sequence similarity 203, member A [Source:HGNC Symbol;Acc:HGNC:24161]
ENSDART00000152128	-6.61665	0.0080361	yes	MYC-associated zinc finger protein (purine-binding transcription factor) [Source:HGNC Symbol;Acc:HGNC:6914]
ENSDART00000111039	-6.65991	0.0080361	yes	GTP-binding protein 8 (putative) [Source:HGNC Symbol;Acc:HGNC:25007]
ENSDART00000135850	-6.65991	0.0015348	yes	nuclear factor I/C [Source:ZFIN;Acc:ZDB-GENE-080305-2]
ENSDART00000130430	-6.70912	6.1425e-05	yes	autophagy related 2A [Source:HGNC Symbol;Acc:HGNC:29028]
ENSDART00000143002	-6.77223	0.0080361	yes	RWD domain containing 3 [Source:ZFIN;Acc:ZDB-GENE-040426-1723]
ENSDART00000149960	-6.77447	9.2059e-07	yes	fatty acid synthase [Source:ZFIN;Acc:ZDB-GENE-030131-7802]
ENSDART00000142710	-6.80963	0.0080361	yes	si:ch211-74m13.1 [Source:ZFIN;Acc:ZDB-GENE-081104-12]
ENSDART00000135917	-6.811	0.0080361	yes	WD repeat domain 13 [Source:ZFIN;Acc:ZDB-GENE-050522-274]
ENSDART00000149854	-6.92142	0.00089168	yes	si:ch1073-228j22.1 [Source:ZFIN;Acc:ZDB-GENE-110411-219]
ENSDART00000151858	-6.95148	0.002652	yes	zgc:64065 [Source:ZFIN;Acc:ZDB-GENE-040426-1355]
ENSDART00000054925	-7.00225	0.0080361	yes	PEST proteolytic signal containing nuclear protein [Source:ZFIN;Acc:ZDB-GENE-041010-130]
ENSDART00000054057	-7.13293	0.0005197	yes	DDRGK domain containing 1 [Source:ZFIN;Acc:ZDB-GENE-040426-1050]
ENSDART00000154953	-7.25243	0.0005197	yes	glycosyltransferase 1 domain containing 1 [Source:HGNC Symbol;Acc:HGNC:26483]
ENSDART00000108965	-7.30576	0.002652	yes	granulito [Source:ZFIN;Acc:ZDB-GENE-081022-203]
ENSDART00000121586	-7.33113	0.0046033	yes	chromodomain helicase DNA binding protein 7 [Source:ZFIN;Acc:ZDB-GENE-070912-179]
ENSDART00000137574	-7.37393	0.009511	yes	caspase 9, apoptosis-related cysteine protease [Source:ZFIN;Acc:ZDB-GENE-030825-5]
ENSDART00000152920	-7.37393	0.0080361	yes	solute carrier family 25, member 29 [Source:ZFIN;Acc:ZDB-GENE-050913-70]
ENSDART00000148513	-7.47051	0.0080361	yes	LIM domain kinase 1b [Source:ZFIN;Acc:ZDB-GENE-110411-106]
ENSDART00000122331	-7.56345	0.0046033	yes	rhotekin 2b [Source:ZFIN;Acc:ZDB-GENE-040912-64]
ENSDART00000137923	-7.71789	0.002652	yes	spermatogenesis associated 6 [Source:ZFIN;Acc:ZDB-GENE-050417-351]
ENSDART00000134437	-7.98819	7.455e-06	yes	breast cancer metastasis-suppressor 1-like a [Source:ZFIN;Acc:ZDB-GENE-050913-49]
ENSDART00000138372	-8.01453	3.6182e-05	yes	si:dkey-246g23.2 [Source:ZFIN;Acc:ZDB-GENE-050419-100]
ENSDART00000125452	-8.11975	0.0080361	yes	Uncharacterized protein [Source:UniProtKB/TrEMBL;Acc:E7FG25]
ENSDART00000046766	-8.17493	0.00089169	yes	homeo box A10b [Source:ZFIN;Acc:ZDB-GENE-990415-97]
ENSDART00000112959	-8.22655	2.615e-06	yes	ankyrin repeat domain 1a (cardiac muscle) [Source:ZFIN;Acc:ZDB-GENE-100405-1]
ENSDART00000152306	-8.24638	0.0026519	yes	coronin, actin binding protein, 2A [Source:ZFIN;Acc:ZDB-GENE-030131-2258]
ENSDART00000146659	-8.32119	0.0046033	yes	methionyl aminopeptidase 1 [Source:ZFIN;Acc:ZDB-GENE-050626-124]
ENSDART00000134177	-8.38499	0.0046033	yes	zgc:101040 [Source:ZFIN;Acc:ZDB-GENE-040801-107]
ENSDART00000149488	-8.38774	0.0046033	yes	ubiquitin protein ligase E3 component n-recognin 1 [Source:ZFIN;Acc:ZDB-GENE-091110-2]
ENSDART00000138708	-8.75245	0.002652	yes	neuroblastoma amplified sequence [Source:ZFIN;Acc:ZDB-GENE-041014-367]
ENSDART00000150326	-8.99181	3.0876e-09	yes	oxysterol binding protein [Source:ZFIN;Acc:ZDB-GENE-090312-18]
ENSDART00000133974	-9.98496	0.0080361	yes	si:ch211-105n15.1 [Source:ZFIN;Acc:ZDB-GENE-110411-33]
